# Supplementary material for: Decoding the IGF1 signaling gene regulatory network behind alveologenesis from a mouse model of bronchopulmonary dysplasia
Source: eLife. 2022 Oct 10;11:e77522. doi: 10.7554/eLife.77522 (PMC9581530; doi:10.7554/eLife.77522)
Supplement: Figure 3—source data 1. — Cells in red: data points which meet the cutoff criteria designated in the paper or the cell type where the gene is annotated as expressing. [file elife-77522-fig3-data1.xlsx]

## Sheet: Table 1
Gene	Ctrl_GFP			Ctrl_Tomato			Mut_GFP			Level of expression in SCMF		Fold enrichment in SCMF					DE expression (fold change) in SCMF					Cellular expression in Lung
	deltaCT to Gapdh			deltaCT to Gapdh			deltaCT to Gapdh			Ctrl_GFP		Ctrl_GFP/Ctrl_Tomato					Mut_GFP/Ctrl_GFP					Lungmap scRNAseq data
	Mouse#1	Mouse#2	Mouse#3	Mouse#1	Mouse#2	Mouse#3	Mouse#1	Mouse#2	Mouse#3	Mean_deltaCT	SEM	#1/#1	#2/#2	#3/#3	Mean	p value	#1/#1	#2/#2	#3/#3	Mean	p value	SCMF	MatrixFB	LipoFB	Epi	Endo	Pericyte	Immune
Ankrd63	-9.33	-9.25	-9.17	-7.98	-8.32	-7.39	-8.58	-9.18	-9.37	-9.25	0.046188	0.392292	0.524858	0.291183	0.402778	0.0313379	1.68179	1.04972	-1.1487	1.20069	0.540703
Arnt2	-6.55	-5.89	-7.24	-10.77	-11.27	-10.59	-8	-5.61	-7.41	-6.56	0.389744	18.6357	41.6429	10.1965	23.4917	0.0180539	-2.73208	1.21419	-1.12506	-1.21504	0.479564
Atoh8	-3.91	-2.4	-3.76	-6.91	-6.97	-7.5095	-3.8	-2.85	-4.32	-3.35667	0.480289	8	23.7524	13.4497	15.0674	0.0141325	1.07923	-1.36604	-1.47427	-1.20503	0.285038
Bmp2	-8.7	-7.41	-9.58	-10.39	-9.64	-12.51	-8.43	-7.13	-10.33	-8.56333	0.630141	3.22657	4.69134	7.6211	5.17967	0.0238332	1.20581	1.21419	-1.68179	1.00487	0.863328
Bmp7	-3.05	-3.18	-2.41	-6.01	-5.9	-6.04	-3.37	-2.67	-1.99	-2.88	0.237978	7.78124	6.58873	12.3805	8.91683	0.007611	0.80107	1.42405	1.33793	1.18768	0.52025
Bmper	-2.36	-2.47	-2.56	-7.58	-6.22	-8.79	-0.7406	-1.277	-1.1468	-2.46333	0.0578312	37.2715	13.4543	75.0614	41.9291	0.0196025	3.07247	2.28628	2.66327	2.67401	0.00755323
Cbx2	-5.31	-5.52	-5.78	-8.27	-6.34	-9.0353	-6.26	-7.37	-6.45	-5.53667	0.135933	7.78124	1.76541	9.54867	6.36511	0.0924493	-1.93187	-3.605	-1.59107	-2.10743	0.0830784
CLEC2D	-10.12	-8.02	-8.99	-12.75	-12.09	-12.78	-10.9847	-9.88	-10.81	-9.04333	0.606804	6.19026	16.7955	13.8326	12.2728	0.0155233	-1.82096	-3.63008	-3.53081	-2.70793	0.0431493
Cyr61	0.48	1.43	0.88	-3.24	-3.2	-3.29	-0.78	-0.9	-0.322	0.93	0.275379	13.1775	24.761	18.0009	18.6465	0.00393895	-2.39496	-5.02805	-2.30058	-2.85415	0.0488751
Dach1	-2.5	-2	-2.69	-4.34	-4.41	-5.85	-3.332	-3.2165	-3.9735	-2.39667	0.205778	3.5801	5.31474	8.9383	5.94438	0.02312	-1.78015	-2.32382	-2.43429	-2.13847	0.0156651
Edn3	-5.98	-4.95	-5.63	-8.46	-6.97	-9.23	-6.69	-5.31	-7.3	-5.52	0.302379	5.57897	4.05584	12.1257	7.25352	0.0288942	-1.6358	-1.28343	-3.18215	-1.7598	0.14491
Efnb2	0.99	0.99	0.53	-1.54	-0.49	-2.68	0.229	-0.2532	-0.4276	0.836667	0.153333	5.77572	2.78949	9.25351	5.93957	0.0410443	-1.69466	-2.36723	-1.94208	-1.96408	0.0195185
Elmo1	-0.55	0.05	-0.12	-4.486	-3.18	-3.94	-0.6445	-0.89	-0.9	-0.206667	0.178543	15.3057	9.38268	14.1232	12.9372	0.00354382	-1.0677	-1.91853	-1.71713	-1.47045	0.144902
Erg	-6.37	-5.65	-6.8	-10	-8.67	-10.18	-6.28	-6.21	-7.47	-6.27333	0.335476	12.3805	8.11168	10.4107	10.301	0.00279241	1.06437	-1.47427	-1.59107	-1.26519	0.250227
Fgf10	-2.98	-1.46	-2.81	-7.82	-6.95	-9.1	-6.06	-3.78	-5.38	-2.41667	0.480844	28.6408	44.9422	78.249	50.6107	0.00568027	-8.45614	-4.99332	-5.93809	-6.16106	0.00701142
Fgf16	-5.89	-4.45	-6.22	-9	-7.75	-8.8	-6.29	-5.36	-8.17	-5.52	0.543415	8.63383	9.84916	5.9794	8.15413	0.00512854	-1.31951	-1.87905	-3.86375	-1.93691	0.140072
Fgf18	-3.69	-2.69	-2.94	-8.02	-8.09	-7.7	-4.48	-3.01	-3.53	-3.10667	0.300463	20.1122	42.2243	27.0958	29.8108	0.00411666	-1.72907	-1.24833	-1.50525	-1.46788	0.0531856
Fgl2	-3.16	-1.42	-3.02	-3.55	-2.28	-3.63	-4.009	-2.9276	-3.4804	-2.53333	0.558132	1.31039	1.81504	1.52626	1.55056	0.0447586	-1.80125	-2.84337	-1.37592	-1.83638	0.0916155
FoxC2	-4.6	-4.8	-3.93	-3.7093	-4.153	-3.8849	-5.51	-4.88	-3.25	-4.44333	0.26308	0.539352	0.638607	0.969223	0.715727	0.170612	-1.87905	-1.05702	1.60214	1.02679	0.842838
Foxd1	-5.14	-3.24	-4.59	-10.6698	-9.68	-10.94	-7.77	-6.49	-7.5	-4.32333	0.564456	46.1993	86.8227	81.5719	71.5313	0.00224099	-6.19026	-9.51366	-7.51618	-7.50558	0.00372212
FoxF1	-1.96	0.05	-1.73	-3.1	-2.26	-3.34	-2.52	-0.17	-1.27	-1.21333	0.635147	2.20381	4.95883	3.05252	3.40505	0.0382974	-1.47427	-1.16473	1.37554	-1.03007	0.756059
Foxl1	-5.04	-3.75	-5.71	-10.48	-10.87	-10.52	-4.53	-3.99	-5.47	-4.83333	0.575162	43.4113	139.102	28.0514	70.1883	0.0138833	1.42405	-1.18099	1.18099	1.1506	0.51936
FoxQ1	-4.69	-2.73	-4.49	-7.56	-7.24	-8.25	-4.7348	-2.23	-3.83	-3.97	0.622682	7.31065	22.7848	13.5479	14.5478	0.0159064	-1.03154	1.41421	1.58008	1.32124	0.223535
Grem1	-3.46	-3.05	-4.24	-9.06	-7.25	-9.11	-3.78	-3.9642	-4.42	-3.58333	0.349014	48.5029	18.3792	29.2426	32.0416	0.00676547	-1.24833	-1.88452	-1.13288	-1.35476	0.171221
H2-Eb1	-8.86	-7.36	-8.92	-9.56	-9.92	-11.67	-8.43	-6.82	-8.92	-8.38	0.510294	1.6245	5.89708	6.72717	4.74958	0.0920818	1.34723	1.45397	1	1.26707	0.188703
Hr	-4.12	-2.76	-4.98	-7.68	-7.56	-7.44	-4.75	-2.73	-4.69	-3.95333	0.646254	11.7942	27.8576	5.50217	15.0513	0.033372	-1.54756	1.02101	1.22264	-1.03812	0.742176
Igf1r	-2.09	-0.25	-2.28	-4.39	-3.26	-4.09	-4.74	-1.94	-5.22	-1.54	0.647328	4.92458	8.05564	3.50642	5.49555	0.0208708	-6.27667	-3.22657	-7.67411	-5.00371	0.0233826
Lif	-6.18	-6.07	-5.39	-8.12	-8.35	-8.87	-6.2123	-7.2116	-6.3568	-5.88	0.247049	3.83706	4.85678	11.1579	6.61726	0.0315592	-1.02264	-2.20626	-1.9545	-1.5442	0.174022
Lrrc4b	-0.92	-0.33	-1.17	-7.93	-8.16	-9.45	-1.38	-0.56	-1.16	-0.806667	0.24902	128.89	227.544	310.834	222.423	0.00231898	-1.37554	-1.17283	1.00696	-1.15983	0.236774
Meox1	-8.92	-8.29	-7.92	-9.46	-9.95	-10.81	-8.91	-8.36	-8.46	-8.37667	0.291909	1.45397	3.16017	7.4127	4.00895	0.129602	1.00696	-1.04972	-1.45397	-1.1332	0.36393
Nacc2	-4.89	-5.26	-5.92	-7.57	-7.2	-7.29	-5.39	-5.77	-5.8376	-5.35667	0.301238	6.40856	3.83706	2.58471	4.27677	0.0342314	-1.41421	-1.42405	1.05878	-1.21551	0.255095
Pdgfa	-4.96	-4.21	-4.84	-5.59	-4.11	-6.5	-4.9204	-4.71	-5.38	-4.67	0.232594	1.54756	0.933033	3.16017	1.88025	0.289002	1.02783	-1.41421	-1.45397	-1.23828	0.216307
Pdgfd	-1.99	-1.59	-2.64	-6.1366	-4.99	-6.12	-2.06	-3.24	-3.16	-2.07333	0.305959	17.7113	10.5561	11.1579	13.1418	0.0041203	-1.04972	-3.13834	-1.43396	-1.52389	0.253059
PPARgc1a	-6.02	-4.36	-6.85	-7.94	-6.16	-9.7	-6.42	-4.79	-7.89	-5.74333	0.731991	3.78423	3.4822	7.21	4.82548	0.0221948	-1.31951	-1.34723	-2.05623	-1.51023	0.0960486
Rfxank	-6.54	-6.23	-6.79	-10.4735	-9.69	-11.2475	-7.27	-6.3	-6.74	-6.52	0.161967	15.2792	11.0043	21.9706	16.0847	0.00527595	-1.65864	-1.04972	1.03526	-1.15794	0.410908
Rxra	0.64	1.13	1.26	-3.07	-2.17	-4.42	-2.6162	-2.3	-1.44	1.01	0.188768	13.0864	9.84916	51.2685	24.7347	0.0288599	-9.55463	-10.7779	-6.49802	-8.53881	0.00491504
Smad6	-3.99	-3.67	-4.61	-3.34	-2.96	-3.4	-3.73	-3.11	-4.12	-4.09	0.275923	0.63728	0.61132	0.432269	0.56029	0.0403564	1.19748	1.47427	1.40444	1.35873	0.0404668
Sox11	-7.17	-5.34	-7.18	-8.24	-7.04	-7.94	-8.31	-5.3	-7.63	-6.56333	0.611673	2.09943	3.24901	1.69349	2.34731	0.0510444	-2.20381	1.02811	-1.36604	-1.35506	0.270222
Sox13	-5.74	-5.55	-6.16	-5.04	-4.74	-5.21	-5.85	-5.34	-6.68	-5.81667	0.180216	0.615572	0.570382	0.517632	0.567862	0.00769336	-1.07923	1.15669	-1.43396	-1.07889	0.575693
Sox7	-4.26	-2.42	-5.4	-3.91	-2.41	-4.1	-3.98	-4.42	-5.45	-4.02667	0.868127	0.784584	0.993092	0.406126	0.727934	0.288137	1.21419	-4	-1.03526	-1.2345	0.494135
Sox8	-3.25	-2.58	-3.87	-8.81	-7.14	-9.01	-5.45	-4.54	-6.68	-3.23333	0.372484	47.1766	23.5883	35.261	35.342	0.00323246	-4.59479	-3.89062	-7.01285	-4.86018	0.0116517
SP6	-9.48	-9.3	-8.41	-11.02	-8.94	-11.6012	-9.25	-9.65	-7.64	-9.06333	0.330774	2.90795	0.779165	9.1337	4.2736	0.291409	1.17283	-1.27456	1.70527	1.2209	0.571859
Tbx2	3.39	4.5	3.32	-2.08	-1.71	-3.83	0.54	1.4643	-0.11	3.73667	0.382201	44.3235	74.028	142.025	86.7921	0.00594484	-7.21	-8.20043	-10.7779	-8.4884	0.0030189
Tbx5	-4.48	-2.75	-4.89	-7.48	-7.85	-8.42	-4.88	-3.703	-5.26	-4.04	0.655769	8	34.2968	11.5514	17.9494	0.0254472	-1.31951	-1.93589	-1.29235	-1.4647	0.0938262
Wnt5a	2.91	4.21	2.64	-2.22	-1.29	-2.56	-0.25	1.19	0.03	3.25333	0.484642	35.0174	45.2548	36.7583	39.0102	0.00046219	-8.9383	-8.11168	-6.10504	-7.51962	0.00315722
Wnt5b	-5.59	-3.41	-6.06	-9.68	-9.24	-10.2	-5.26	-3.87	-6.07	-5.02	0.816354	17.0299	56.8859	17.6305	30.5154	0.0145635	1.25701	-1.37554	-1.00696	-1.00769	0.857247
Zfp217	-5.46	-4.17	-6.9	-5.64	-3.9	-6.97	-6.41	-4.56	-7.94	-5.51	0.78848	1.13288	0.82932	1.04972	1.00397	0.965216	-1.93187	-1.31039	-2.05623	-1.69771	0.0598538
Acta2	1.64	1.95	1.1	-2.49	-1.7275	-3.41	-0.29	0.94	-1.31	1.56333	0.24835	17.5087	12.7949	22.7848	17.6961	0.00341704	-3.81055	-2.01391	-5.31474	-3.16746	0.0491694
Actc1	1.4	2.65	1.93	-7.13	-4.88	-7.82	-0.67	-0.21	-1.22	1.99333	0.362231	369.646	184.823	861.078	471.849	0.00552081	-4.19887	-7.26015	-8.87656	-6.14057	0.0140548
BGN	3.29	5.03	2.63	-0.83	-0.4	-1.18	1.71	3.18	0.73	3.65	0.715821	17.3878	43.1115	14.0257	24.8416	0.0122012	-2.9897	-3.605	-3.73213	-3.4098	0.00311469
Cnn1	-1.23	0.4	-0.52	-7.61	-7.68	-7.22	-3.2	-1.93	-2.97	-0.45	0.47184	83.2859	270.597	103.968	152.617	0.00542384	-3.91768	-5.02805	-5.46416	-4.70848	0.00408349
Col10a1	-3.28	-1.92	-4.26	-7.89	-5.95	-7.95	-3.06	-1.95	-3.84	-3.15333	0.678462	24.4201	16.3362	12.9063	17.8875	0.00424308	1.16473	-1.02101	1.33793	1.16069	0.258684
Col6a6	-6.18	-5.74	-5.66	-9.82	-9.79	-11.24	-5.9102	-6.28	-6.22	-5.86	0.161658	12.4666	16.5642	47.8352	25.622	0.0173484	1.20564	-1.45397	-1.47427	-1.16654	0.417884
Dermo1	-1.61	-0.05	-1.99	-8.3759	-7.82	-9.8	-4.52	-3.36	-5.05	-1.21667	0.593558	108.828	218.275	224.411	183.838	0.00209613	-7.51618	-9.91766	-8.33973	-8.47974	0.00141943
Des	-2.23	-1.26	-3.56	-6.08	-4.75	-5.88	-3.197	-2.47	-5.49	-2.35	0.666658	14.42	11.2356	4.99332	10.2163	0.0199583	-1.95477	-2.31338	-3.81055	-2.48701	0.0418283
Eln	2.48	3.85	3.12	-1.13	-1.01	-2.51	1.06	1.71	0.95	3.15	0.395769	12.2101	29.0406	49.5221	30.2576	0.0153233	-2.67586	-4.40762	-4.50023	-3.64607	0.0160781
FN1	-4.13	-4.35	-3.35	-8.4	-7.975	-7.77	-2.8886	-2.5668	-1.7404	-3.94333	0.303388	19.2929	12.3377	21.4068	17.6792	0.00351088	2.36428	3.44189	3.05167	2.95261	0.0105239
Gli1	-4.54	-3.87	-4.65	-9.11	-7.6	-9.5	-5.643	-6.27	-6.21	-4.35333	0.243744	23.7524	13.2691	28.84	21.9538	0.00584237	-2.14801	-5.27803	-2.94854	-3.01761	0.0470993
Pdgfra	0.11	1.31	-0.72	-4.56	-4.21	-4.97	-1.87	-0.81	-2.57	0.233333	0.589246	25.4572	45.8866	19.0273	30.1237	0.00596923	-3.94493	-4.34694	-3.605	-3.94255	0.00154152
SM22a	0.31	0.8	0.75	-4.45	-3.43	-4.45	0.12	0.02	0.48	0.62	0.155671	27.0958	18.7654	36.7583	27.5399	0.00349625	-1.14076	-1.71713	-1.20581	-1.31102	0.154759
SMMHC	-1.68	0.19	-1.82	-5.62	-5.85	-6.58	-2.15	-0.741	-2.48	-1.10333	0.647928	15.3482	65.7993	27.0958	36.0811	0.0151168	-1.38511	-1.9066	-1.58008	-1.59631	0.035882
TNC	-3.98	-4	-4.74	-7.97	-6.63	-9.31	-5.3954	-5.5326	-5.682	-4.24	0.250067	15.8895	6.19026	23.7524	15.2774	0.0229429	-2.66734	-2.89307	-1.92119	-2.41727	0.0188383
Adrp	-7.69	-7.14	-7.3	-6.19	-4.06	-5.85	-7.57	-6.8381	-7.36	-7.37667	0.163333	0.353553	0.118257	0.366021	0.279277	0.0641507	1.08673	1.23277	-1.04247	1.09292	0.367546
Hcls1	-6.92	-5.87	-8.05	-2.37	-0.9	-3.1	-6.7	-6.251	-7.82	-6.94667	0.629453	0.0426888	0.0319066	0.032352	0.0356491	0.000803307	1.16473	-1.30224	1.17283	1.03516	0.919756
Hopx	-7.65	-7.33	-7.96	-3.59	-3.55	-3.41	-7.63	-7.95	-8.41	-7.64667	0.181873	0.059954	0.0727958	0.0426888	0.0584795	0.00295534	1.01396	-1.53688	-1.36604	-1.25174	0.20896
