# Supplementary material for: Decoding the IGF1 signaling gene regulatory network behind alveologenesis from a mouse model of bronchopulmonary dysplasia
Source: eLife. 2022 Oct 10;11:e77522. doi: 10.7554/eLife.77522 (PMC9581530; doi:10.7554/eLife.77522)
Supplement: Figure 3—source data 2. — Primers are for Mus musculus by default and for Homo sapiens when denoted with Hs. [file elife-77522-fig3-data2.xlsx]

## Sheet: Source Data 2
Name	Sequence	Memo#1	Memo#2
Abca3-01	GGGCTGAGCTGTCCTTTATT	QPCR	Forward
Abca3-02	CCCAACTCCTTCTGCTTCTT	QPCR	Reverse
Acta2-01	CCATCATGCGTCTGGACTT	QPCR	Forward
Acta2-02	GGCAGTAGTCACGAAGGAATAG	QPCR	Reverse
Actc1-01	CCTCTCTGGAGAAGAGCTATGA	QPCR	Forward
Actc1-02	AATGAAAGAGGGCTGGAAGAG	QPCR	Reverse
Adrp-01	GAAGGATGTGGTGACGACTAC	QPCR	Forward
Adrp-02	TCACTGCTCCTTTGGTCTTATC	QPCR	Reverse
Ager-01	GTTGAGCCTGAAGGTGGAATAG	QPCR	Forward
Ager-02	AAGGGTGCACCATCCTTTATC	QPCR	Reverse
Akap5-01	GGAGTCTTAGACACGGCTTTAC	QPCR	Forward
Akap5-02	CTCATAGGCCACAGAGCTAATG	QPCR	Reverse
Ankrd63-01	TTGGACAAGAGGGCTGATTATG	QPCR	Forward
Ankrd63-02	CCAGAAGGGAAAGCTGGTAAA	QPCR	Reverse
Aqp5-01	GGCTGCAATCCTCTACTTCTAC	QPCR	Forward
Aqp5-02	TTCTTCCGCTCCTCTCTATGA	QPCR	Reverse
Arnt2-01	CTATGTCCTAACTTGCCCATCC	QPCR	Forward
Arnt2-02	CTGAGCTCATGACCCTTCTTAC	QPCR	Reverse
Atoh8-01	CCATCCAGGGTTACTTCAGATT	QPCR	Forward
Atoh8-02	GGGCCTCATCCATAATTTCCT	QPCR	Reverse
Bex2-01	CCAACTTCTGCCAGCTTCTA	QPCR	Forward
Bex2-02	TGAGCATCTTCCCATGCAATA	QPCR	Reverse
BGN-01	GTCCACTCAGAGACTCCCTATAA	QPCR	Forward
BGN-02	GCAGTGTGCTCTATCCATCTT	QPCR	Reverse
Bmp2-01	AGTAGTTTCCAGCACCGAATTA	QPCR	Forward
Bmp2-02	TTCACTAACCTGGTGTCCAATAG	QPCR	Reverse
Bmp4-01	AACGTAGTCCCAAGCATCAC	QPCR	Forward
Bmp4-02	CGTCACTGAAGTCCACGTATAG	QPCR	Reverse
Bmp7-01	AGAGGTGGGATGTTGGTTATG	QPCR	Forward
Bmp7-02	CCAGTTTAACCCTCTGCATTTG	QPCR	Reverse
Bmper-01	AGCGATGACCTTTGTTCTAGTC	QPCR	Forward
Bmper-02	GCAGAATCAGGCACACAAATAC	QPCR	Reverse
Bmper-Hs-01	AAGTGCAGGGCGTAATAGTG	QPCR	Forward
Bmper-Hs-02	CTGCAGATACGAGGGTGATTAG	QPCR	Reverse
CAG-creER-01	TAAAGATATCTCACGTACTGACGGTG	Genotyping_CAG-creER	Forward
CAG-creER-02	TCTCTGACCAGAGTCATCCTTAGC	Genotyping_CAG-creER	Reverse
CAG-Tomato-01	AAGGGAGCTGCAGTGGAGTA	Genotyping_CAG-Tomato	WT Forward
CAG-Tomato-02	CCGAAAATCTGTGGGAAGTC	Genotyping_CAG-Tomato	WT Reverse
CAG-Tomato-03	CTGTTCCTGTACGGCATGG	Genotyping_CAG-Tomato	Mutant Forward
CAG-Tomato-04	GGCATTAAAGCAGCGTATCC	Genotyping_CAG-Tomato	Mutant Reverse
Cav1-01	ACTTCCCAGCTCACATTACAG	QPCR	Forward
Cav1-02	AGTCAAGCAGGGTTCCAATAC	QPCR	Reverse
Cbx2-01	ATGTCACAGCCAACCTCATC	QPCR	Forward
Cbx2-02	CTCGGGCAATGGTCTCAATAA	QPCR	Reverse
CD31-01	CACCCATCACTTACCACCTTATG	QPCR	Forward
CD31-02	TGTCTCTGGTGGGCTTATCT	QPCR	Reverse
Cd36-01	GGAGTGCTGGATTAGTGGTTAG	QPCR	Forward
Cd36-02	GCTGTGAGCAGACGTATAGAAG	QPCR	Reverse
CLEC2D-01	ATAGCCTCCACTGCCAAAC	QPCR	Forward
CLEC2D-02	GAAAGAGTAGCACCCACAGATAA	QPCR	Reverse
Clic5.1-01	GGAGGGATGGGAGGAAATAAAG	QPCR	Forward
Clic5.1-02	CTGATGTTGGAGTCTGCTCTAC	QPCR	Reverse
Cnn1-01	TTGAGAGAAGGCAGGAACATC	QPCR	Forward
Cnn1-02	GTACCCAGTTTGGGATCATAGAG	QPCR	Reverse
Col10a1-01	CCCTGGTTCATGGGATGTTT	QPCR	Forward
Col10a1-02	TGGCGTATGGGATGAAGTATTG	QPCR	Reverse
Col15a1-01	TGCGTGTTTACCCAGTCATAG	QPCR	Forward
Col15a1-02	AGGATTCTGTGCTGTTTCTCTC	QPCR	Reverse
Col1a1-01	GCTTGAAGACCTATGTGGGTATAA	QPCR	Forward
Col1a1-02	GGTGGAGAAAGGAGCAGAAA	QPCR	Reverse
Col4a3-01	CTGGCACTCTTAAGGTCATCTC	QPCR	Forward
Col4a3-02	GTCCAGGGTCTCCTTTCATTC	QPCR	Reverse
Col6a6-01	GCTGAACCACCTGAAGAAGAA	QPCR	Forward
Col6a6-02	TTTGTGGGAGCAGAGAAATAGG	QPCR	Reverse
Cryab-01	TCTTCTCAACAGCCACTTCC	QPCR	Forward
Cryab-02	TCCTTCTCCAAACGCATCTC	QPCR	Reverse
Cyr61-01	CCAGTGTACAGCAGCCTAAA	QPCR	Forward
Cyr61-02	CTGGAGCATCCTGCATAAGTAA	QPCR	Reverse
Cyr61-Hs-01	GAAGCAGCGTTTCCCTTCTA	QPCR	Forward
Cyr61-Hs-02	CTGACACTCTTCTCCCTTGTTT	QPCR	Reverse
Dach1-01	TCTAACTGGGCATGGACAAC	QPCR	Forward
Dach1-02	GGCCCTGTATGTTAGTGAGAAG	QPCR	Reverse
Dermo1-01	CCAAGGCTCTCAGAACAAGAA	QPCR	Forward
Dermo1-02	GGAGACGTAAAGAACAGGAGTATG	QPCR	Reverse
Dermo1-cre-01	TAAAGATATCTCACGTACTGACGGTG	Genotyping_Dermo1-cre	Forward
Dermo1-cre-02	TCTCTGACCAGAGTCATCCTTAGC	Genotyping_Dermo1-cre	Reverse
Dermo1-Hs-01	AGACTCTGGTGCTGACTCTATC	QPCR	Forward
Dermo1-Hs-02	CTGTGTCCTCTTCCTCCTCTAA	QPCR	Reverse
Des-01	TGACTCAGGCAGCCAATAAG	QPCR	Forward
Des-02	GCATCAATCTCGCAGGTGTA	QPCR	Reverse
Edn3-01	CGCTTGCGTTGTACTTGTATG	QPCR	Forward
Edn3-02	CTTTCTGCTCTCCCGGAATAA	QPCR	Reverse
Efnb2-01	AGAAGAGCAGAGAGCCAAATC	QPCR	Forward
Efnb2-02	ATCTGACCTGCCTTTCCTAATG	QPCR	Reverse
Egfl6-01	GCAAATGCAAGCAGGGATATAG	QPCR	Forward
Egfl6-02	CCCAGGTGCTGTGAGTATTT	QPCR	Reverse
Elmo1-01	CTAAGGCCAGGGTTGGATAAA	QPCR	Forward
Elmo1-02	CACATAGAGCTGATGGTGTGAG	QPCR	Reverse
Eln-01	CTGCCAAAGCTGCCAAATAC	QPCR	Forward
Eln-02	CCAACACCATAGCCAGGAAA	QPCR	Reverse
EMCN-01	CCCTACACCTGGGCAATAAA	QPCR	Forward
EMCN-02	GACTGGTGAGAAGACTGGAAAT	QPCR	Reverse
Emp2-01	GATGAGTCTGAGTGGCTTTAGG	QPCR	Forward
Emp2-02	GGAAGGAAGGAAAGGAGGATAG	QPCR	Reverse
Erg-01	CTGACCCAGCAGCTCATATT	QPCR	Forward
Erg-02	GATGCGGTCATCTCTGTCTTAG	QPCR	Reverse
Etv1-01	AAAGGTGGCTGGAGAAAGATAC	QPCR	Forward
Etv1-02	GTTATCCGGAAAGGCCATAGAG	QPCR	Reverse
Fabp5-01	GCCAAGCCAGACTGTATCATTA	QPCR	Forward
Fabp5-02	CTCCCAGGTTACAAGAGAACAC	QPCR	Reverse
Fgf10-01	ATGCTGCCCTCTGGTTTAC	QPCR	Forward
Fgf10-02	AGAGAGAGAGAGAGAGAGAGAGA	QPCR	Reverse
Fgf10-Hs-01	ACTCTTCTTCCTCCTCCTTCTC	QPCR	Forward
Fgf10-Hs-02	GACCTTCCCGTTCTTCTCAATC	QPCR	Reverse
Fgf16-01	GCCTCACAATCTACCCAGATAC	QPCR	Forward
Fgf16-02	ACACTTTCCCAGAGCTCTTTAG	QPCR	Reverse
Fgf18-01	GCGAGAACCAGCAAGATGTA	QPCR	Forward
Fgf18-02	GCTTGGTGACTGTGGTGTAT	QPCR	Reverse
Fgl2-01	GAGACGCTCCATCTGGTAAAT	QPCR	Forward
Fgl2-02	GGAACACTTGCCATCCAAAC	QPCR	Reverse
Flt1-01	AGAGAGAGAGAGAGAGAGAGAGA	QPCR	Forward
Flt1-02	ACAGGGAAGGAATGGACTTTG	QPCR	Reverse
Flt4-01	CTAACCTGTCTGTGGGATTGAG	QPCR	Forward
Flt4-02	CGTAAGGGAGGGTTTGAGAAG	QPCR	Reverse
FN1-01	TCCTGTCTACCTCACAGACTAC	QPCR	Forward
FN1-02	GTCTACTCCACCGAACAACAA	QPCR	Reverse
FOS-01	ATTGTCGAGGTGGTCTGAATG	QPCR	Forward
FOS-02	TCGAAAGACCTCAGGGTAGAA	QPCR	Reverse
FoxC2-01	TCTGTAAACGAGTGCGGATTT	QPCR	Forward
FoxC2-02	TGGGCAAGACGAAACCTTATC	QPCR	Reverse
Foxd1-01	TAGCTCAGAGGGTCCATCTATT	QPCR	Forward
Foxd1-02	AATTCCTAGTGCCAAGACAGAG	QPCR	Reverse
Foxd1GCE-01	TCTGGTCCAAGAATCCGAAG	Genotyping_Foxd1GCE	Common Reverse
Foxd1GCE-02	CTCCTCCGTGTCCTCGTC	Genotyping_Foxd1GCE	WT Forward
Foxd1GCE-03	GGGAGGATTGGGAAGACAAT	Genotyping_Foxd1GCE	Mutant Forward
Foxd1-Hs-01	CTGTCCAGTGTCGAGAACTTTA	QPCR	Forward
Foxd1-Hs-02	CGAACCACCAAGACGAGAAA	QPCR	Reverse
FoxF1-01	CATGTGTGACAGAAAGGAGTTTG	QPCR	Forward
FoxF1-02	GTGACCTGCTGGTGATAGTAAG	QPCR	Reverse
Foxl1-01	TACTCCTGAGTGTGGGAGATAG	QPCR	Forward
Foxl1-02	CTGGAGGGATATAAAGGGAACAC	QPCR	Reverse
FoxQ1-01	GGCTTTCCTTTCCCTCCTATTT	QPCR	Forward
FoxQ1-02	GGAGTGGTTCCCTGATGTATTT	QPCR	Reverse
Gapdh-01	GTGGCAAAGTGGAGATTGTTG	QPCR	Forward
Gapdh-02	CGTTGAATTTGCCGTGAGTG	QPCR	Reverse
Gapdh-Hs-01	GGTGTGAACCATGAGAAGTATGA	QPCR	Forward
Gapdh-Hs-02	GAGTCCTTCCACGATACCAAAG	QPCR	Reverse
Gli1-01	ACCACCCTACCTCTGTCTATTC	QPCR	Forward
Gli1-02	TTCAGACCATTGCCCATCAC	QPCR	Reverse
Gli1-creERT2-01	TAAAGATATCTCACGTACTGACGGTG	Genotyping_Gli1-creERT2	Forward
Gli1-creERT2-02	TCTCTGACCAGAGTCATCCTTAGC	Genotyping_Gli1-creERT2	Reverse
Gli1-Hs-01	AGCTAGAGTCCAGAGGTTCAA	QPCR	Forward
Gli1-Hs-02	TAGACAGAGGTTGGGAGGTAAG	QPCR	Reverse
Grem1-01	GTAACTCTGAGGGCTGCATTAG	QPCR	Forward
Grem1-02	GATGTCAGGGAGAGCAAAGAAA	QPCR	Reverse
H2-Eb1-01	CAGATGTGGCAGGACAATAGA	QPCR	Forward
H2-Eb1-02	CCTTGAGCAGGCTGATTTAGA	QPCR	Reverse
Hc-01	GCTGACGCAGTCTGGATAAA	QPCR	Forward
Hc-02	CACAGTTTGGCCTGGAGAATA	QPCR	Reverse
Hcls1-01	CCGTAACCAGGAACCAGTAAAG	QPCR	Forward
Hcls1-02	CACAAAGTCAGGGTCTGTATCC	QPCR	Reverse
Hopx-01	GATGATGTGGGAACCGTCTT	QPCR	Forward
Hopx-02	CCCTGCCTGTTCTGTTATCTT	QPCR	Reverse
Hr-01	CTCTCCTTCCCGGTCTCTATTA	QPCR	Forward
Hr-02	ATTTCTGCATTCGCCTTCTTTC	QPCR	Reverse
Igf1-01	CGGCAGGAGACATTTGATTTG	QPCR	Forward
Igf1-02	TCTTTCTCCTCTCTCCCTTCTT	QPCR	Reverse
Igf1-f/f-01	CACTAAGGAGTCTGTATTTGGACC	Genotyping_Igf1-f/f	Common Reverse
Igf1-f/f-02	AAACCACACTGCTCGACATTG	Genotyping_Igf1-f/f	Mutant Forward
Igf1-f/f-03	GGCAAATGGAAATCCTATGTCT	Genotyping_Igf1-f/f	WT Forward
Igf1r-03	GGAGGAGTTCGAGACAGAGTA	QPCR	Forward
Igf1r-04	CGATGCGGTACAGAGTGAAA	QPCR	Reverse
Igf1r-f/f-01	CTTCCCAGCTTGCTACTCTAGG	Genotyping_Igf1r-f/f	Forward
Igf1r-f/f-02	CAGGCTTGCAATGAGACATGGG	Genotyping_Igf1r-f/f	Reverse
Igf1r-Hs-01	TTCTCCCTTTCTCTCTCCTCTC	QPCR	Forward
Igf1r-Hs-02	GACAGCCACTTCCTCAAACT	QPCR	Reverse
Il33-01	CCTACTCCCTCAGCTTTCTTTC	QPCR	Forward
Il33-02	GCAGGGTAAAGACAGTGGAATA	QPCR	Reverse
KDR-01	GCGGAGACGCTCTTCATAATA	QPCR	Forward
KDR-02	GACAAGAAGGAGCCAGAAGAA	QPCR	Reverse
Klf2-01	GGCTAGATGCCTTGTGAGAAA	QPCR	Forward
Klf2-02	TGCCATCGTCTCCCTTATAGA	QPCR	Reverse
Lamp3-01	CCTAGTTCCTAGGCCTACTCTT	QPCR	Forward
Lamp3-02	CAATCAGTGCTAGTCCCATCTC	QPCR	Reverse
Lcn2-01	TCCTCAGGTACAGAGCTACAA	QPCR	Forward
Lcn2-02	GCTCCTTGGTTCTTCCATACA	QPCR	Reverse
Lif-01	CTGCTCTCCCTCTTTCCTTTC	QPCR	Forward
Lif-02	ACATTCCCACAGGGTACATTC	QPCR	Reverse
Lmo7-01	CTCTCCCGTTCAATCGTTTCT	QPCR	Forward
Lmo7-02	CTCCTGTTATCCTCGTGTTTGT	QPCR	Reverse
Lrrc4b-01	ACAGGCAACTTCACCAGAG	QPCR	Forward
Lrrc4b-02	GCAAACCTCCCTTCAGTATCA	QPCR	Reverse
Lyz1-01	CAGCCCATTCTGTCTCTTTCT	QPCR	Forward
Lyz1-02	TCTGCTGAAGTCCTGTTACTTG	QPCR	Reverse
Lyz2-01	ATGGAATGGCTGGCTACTATG	QPCR	Forward
Lyz2-02	GGTCTCCACGGTTGTAGTTT	QPCR	Reverse
Meox1-01	AACTCCAAAGGACTGGGAAAC	QPCR	Forward
Meox1-02	CAGAGGAGACCCTGATGTAAGA	QPCR	Reverse
Muc1-01	TACCCTACCTACCACACTCAC	QPCR	Forward
Muc1-02	GAGAGACTGCTACTGCCATTAC	QPCR	Reverse
Nacc2-01	GTTAGGCCTCTACTGTGATGTG	QPCR	Forward
Nacc2-02	CACTGAAGAGGTCTCGGAAATAG	QPCR	Reverse
Pdgfa-01	TCCAGCGACTCTTGGAGATA	QPCR	Forward
Pdgfa-02	TCTCGGGCACATGGTTAATG	QPCR	Reverse
Pdgfd-01	TAGAAATCCGCCGACTCAAC	QPCR	Forward
Pdgfd-02	GCACAGGAGAATGGAGACTAAA	QPCR	Reverse
Pdgfra-01	GACTTCCTAAAGAGTGACCATCC	QPCR	Forward
Pdgfra-02	CTTCCCAGTCCTTCAGCTTATC	QPCR	Reverse
Pdgfra-Hs-01	GGAAACAGAAACCGAGGTATGA	QPCR	Forward
Pdgfra-Hs-02	CTGCATCGGGTCCACATAAA	QPCR	Reverse
Pdpn-01	GTCACCCTGGTTGGAATCATAG	QPCR	Forward
Pdpn-02	GGCGAGAACCTTCCAGAAAT	QPCR	Reverse
PPARgc1a-01	GACAATCCCGAAGACACTACAG	QPCR	Forward
PPARgc1a-02	AGAGAGGAGAGAGAGAGAGAGA	QPCR	Reverse
Rfxank-01	TTACCACCACACCCAAAGAC	QPCR	Forward
Rfxank-02	GACACCAATGCCCTTCAGATA	QPCR	Reverse
Rosa26-mTmG-01	TAGAGCTTGCGGAACCCTTC	Genotypin_Rosa26mTmG	Mutant Forward
Rosa26-mTmG-02	AGGGAGCTGCAGTGGAGTAG	Genotypin_Rosa26mTmG	WT Forward
Rosa26-mTmG-03	CTTTAAGCCTGCCCAGAAGA	Genotypin_Rosa26mTmG	Common Reverse
Rtkn2-01	TATAGGAAGCCGGGACTATGT	QPCR	Forward
Rtkn2-02	CTGCTCTGGCCTTTACCTATAC	QPCR	Reverse
Rxra-01	TCCGCAGGGAGTAAAGATAGA	QPCR	Forward
Rxra-02	CCATCCAGTTTACATGAGGGATAA	QPCR	Reverse
Rxra-Hs-01	GGACCCTCCTTTGGTGAAAT	QPCR	Forward
Rxra-Hs-02	AGGATTGGGAACGGCTAAAG	QPCR	Reverse
S100a14-01	CGAGCAACTGTGGGTTAGAA	QPCR	Forward
S100a14-02	CCTCTCCATCTTCACACTCTTG	QPCR	Reverse
S100a6-01	GCCTTGGCTTTGATCTACAATG	QPCR	Forward
S100a6-02	TAACTACCCACCACTGGATTTG	QPCR	Reverse
S100g-01	AGAATGGCGATGGAGAAGTTAG	QPCR	Forward
S100g-02	CGTGCGTTCAATCAGTAGGT	QPCR	Reverse
Scd1-01	AGAGAGAGAGAGAGAGAGAGAGA	QPCR	Forward
Scd1-02	GGTTCAGAGGATGGACAGAAAG	QPCR	Reverse
Sdpr-01	CGGTGCTGATGGTAAGCTAATA	QPCR	Forward
Sdpr-02	TGGCATTCTTTGTTCTCCATTTC	QPCR	Reverse
Sftpa1-01	GGTGTCTAAGAAGCCAGAGAAC	QPCR	Forward
Sftpa1-02	CAAGATCCAGATCCAAGGAAGAG	QPCR	Reverse
Sftpb-01	TTGTCCACCTCCTCACAAAG	QPCR	Forward
Sftpb-02	GCAGCTTCAAGGGAAGGATA	QPCR	Reverse
Sftpc-01	CAGACACCATCGCTACCTTT	QPCR	Forward
Sftpc-02	GTTCCTGGAGCTGGCTTATAG	QPCR	Reverse
Sftpd-01	ACAATGGTGGAGCAGAGAAC	QPCR	Forward
Sftpd-02	GTGGCTCAGAACTCACAGATAA	QPCR	Reverse
Slc34a2-01	GAGTCAAGATGAAGCCAGTAGG	QPCR	Forward
Slc34a2-02	GGTATTACACGTGGGCTCTAAA	QPCR	Reverse
SM22a-01	CTAATGGCTTTGGGCAGTTTG	QPCR	Forward
SM22a-02	CTGTCTGTGAAGTCCCTCTTATG	QPCR	Reverse
Smad6-01	CGCACTTTGGCTTGTAATTCTT	QPCR	Forward
Smad6-02	GGCTTTCCACCTAGTTCTACTG	QPCR	Reverse
SMMHC-01	CTTCCTGGGCATTCTGGATATT	QPCR	Forward
SMMHC-02	CAGCTTCTCGTTGGTGTAGTT	QPCR	Reverse
Soat1-01	CTACAGCCATTTCACGTTGTATTT	QPCR	Forward
Soat1-02	TTGCTCCCTCTCCCTCTTAT	QPCR	Reverse
SOCS3-01	GGTTCTGCTTTGTCTCTCCTATG	QPCR	Forward
SOCS3-02	TCCCTCAACTCTCTGCCTATT	QPCR	Reverse
Sox11-01	CTACTGGCCAGGCTTCAATAA	QPCR	Forward
Sox11-02	ACGCCCACGTTACCATTT	QPCR	Reverse
Sox13-01	CCATGACCAACCAGGAGAAA	QPCR	Forward
Sox13-02	AGGCCTTGGCTTGTACTTATAG	QPCR	Reverse
Sox7-01	CTCCTGGGTACTGGGATTAAAG	QPCR	Forward
Sox7-02	CTGTAGTCGCCTGAGATGTATG	QPCR	Reverse
Sox8-01	TTGCTCTCCGGTTTGGATAAG	QPCR	Forward
Sox8-02	TGAAGCCCATTCTCTCCTTTG	QPCR	Reverse
Sox8-Hs-01	TCGTTAGGGCCTCAGTTCTA	QPCR	Forward
Sox8-Hs-02	AGGCGCTATTGTATGCTCTATG	QPCR	Reverse
SP6-01	CTGTCTGGACACGTCTTTAGTT	QPCR	Forward
SP6-02	CACCTCATCTCTGCTTTCTCTC	QPCR	Reverse
Spry2-01	CTGCTGCTGCTGATGGAATA	QPCR	Forward
Spry2-02	TAGGCATGCAGACCCAAATC	QPCR	Reverse
Tbx2-01	AGCGTAGACTTGAGCTAGGA	QPCR	Forward
Tbx2-02	GCTGATCCAGAAGTGGACATAG	QPCR	Reverse
Tbx2-Hs-01	ACATCCTGAAGCTGCCTTAC	QPCR	Forward
Tbx2-Hs-02	AGCTGTGTGATCTTGTCATTCT	QPCR	Reverse
Tbx5-01	AGAGAGAGAGAGAGAGAGAGAGA	QPCR	Forward
Tbx5-02	CTTGAGAGAGACTTGGGAATCAG	QPCR	Reverse
Tgfb2-01	GGAACCACTGACCATTCTCTATT	QPCR	Forward
Tgfb2-02	CTGGCTTTCCCAAGGACTTTA	QPCR	Reverse
Tgfbr1-01	GGGCTTAGTGTTCTGGGAAA	QPCR	Forward
Tgfbr1-02	CCGATGGATCAGAAGGTACAAG	QPCR	Reverse
Tgfbr2-01	CTGTGGGAGAAGTGAAGGATTAC	QPCR	Forward
Tgfbr2-02	GTCTCTCAGCACACTGTCTTTC	QPCR	Reverse
TNC-01	CCAGGGTTGCCACCTATTT	QPCR	Forward
TNC-02	GTCTAGAGGATCCCACTCTACTT	QPCR	Reverse
Trf-01	CCCTCTGTGACCTGTGTATTG	QPCR	Forward
Trf-02	CTTTCTCAACGAGACACCTGAA	QPCR	Reverse
Vegfa-01	TGGTTCTTCACTCCCTCAAATC	QPCR	Forward
Vegfa-02	GGTCTCTCTCTCTCTTCCTTGA	QPCR	Reverse
Wnt11-01	GGCTCACTTCAATCCCTCTTTA	QPCR	Forward
Wnt11-02	GGGCTTGCTCAGCATTTATTT	QPCR	Reverse
Wnt5a-01	GTCCTTTGAGATGGGTGGTATC	QPCR	Forward
Wnt5a-02	TACCAGAGCACCTGCAATTC	QPCR	Reverse
Wnt5a-f/f-01	TGAGGGACTGGAAGTTGCAGG	Genotyping_Wnt5a-f/f	Forward
Wnt5a-f/f-02	TTCCAATGGGCTTCTGGAGAG	Genotyping_Wnt5a-f/f	Reverse
Wnt5a-Hs-03	CGTCTGGAAGCAGACGTTTC	QPCR	Forward
Wnt5a-Hs-04	TCACGCCTCCTGATCTCC	QPCR	Reverse
Wnt5b-01	AGAGTGCCAACACCAGTTT	QPCR	Forward
Wnt5b-02	CTCGGCTACCTATCTGCATAAC	QPCR	Reverse
Zfp217-01	GCTGGTAGAGCTAGAGCTAATG	QPCR	Forward
Zfp217-02	AGGCAACACCCACTCAAA	QPCR	Reverse
