# Supplementary material for: Decoding the IGF1 signaling gene regulatory network behind alveologenesis from a mouse model of bronchopulmonary dysplasia
Source: eLife. 2022 Oct 10;11:e77522. doi: 10.7554/eLife.77522 (PMC9581530; doi:10.7554/eLife.77522)
Supplement: Figure 4—source data 1. [file elife-77522-fig4-data1.xlsx]

## Sheet: Table 2
Bulk RNAseq (GSE126457, GSE182886 and GSE106960)								scRNAseq (GSE160876 and GSE165063)								scRNAseq (GSE149563)
SCMF (P14)				AT2 (P14)		AT1 (P15)		MyoFB (P5-14)				AT2 (P5-14)		AT1 (P5-14)		SCMF (P7)				AT2 (P7)		AT1 (P7)
Ligands	Average of Normalized Expression	Receptors	Average of Normalized Expression	Receptors	Average of Normalized Expression	Receptors	Total Reads	Ligands	Average Expression	Receptors	Average Expression	Receptors	Average Expression	Receptors	Average Expression	Ligands	Average Expression	Receptors	Average Expression	Receptors	Average Expression	Receptors	Average Expression
Col3a1	30161.7	Lrp1	1268.16	Cd74	2134.58	Cav1	8715.53	Vim	25.2129	Rpsa	13.4749	Cd74	40.3493	Bcam	21.5567	Ptma	33.4294	Rpsa	11.2273	Cd74	37.5475	Aqp1	17.6099
Col1a1	25282.8	Itgb1	1086.93	Ptprf	1967.7	Cd9	7878.41	Ptma	22.6388	Cd81	10.4096	Rpsa	9.37181	Cd74	9.90555	Rps19	22.578	Cd81	8.91025	Rpsa	8.41119	Bcam	14.8744
Col1a2	18785.2	Mylk	884.408	Bcam	1046.2	Bcam	7252.16	Bgn	19.8764	Itgb1	8.48622	Sdc4	4.99843	Rpsa	9.07899	Vim	13.9282	Ghr	7.36708	Cd63	6.33363	Cd9	12.3033
Col5a1	3460.71	Cd81	583.947	Sdc4	870.678	Cd81	6491.11	Uba52	13.2313	P2ry14	5.17412	Cd63	4.46474	Cd9	6.90124	Gnas	13.4374	P2ry14	5.45605	Sdc4	5.80625	Crlf1	10.2085
Bgn	3368.52	Pdgfra	494.07	Itga9	714.593	Lamp1	6372.92	Col3a1	12.6457	Cd63	4.71567	Bcam	3.82055	Cd81	6.57665	Calm2	11.3306	Itgb1	5.36221	Fgfr2	4.97811	Cd81	9.26017
Col6a2	2939.98	Hhip	490.086	Itgb1	710.864	Pgrmc1	5723.68	Serpine2	11.2183	Mylk	3.76694	Lamp1	3.7597	Lamp1	6.2766	Hmgb1	10.886	Cd63	4.75146	Cd9	4.4219	Cav1	8.10528
Col6a1	2712.99	Maged1	473.231	Lamp1	681.667	Cd63	5100.97	Rps19	10.5142	Ghr	3.74241	Cd36	3.03102	Cav1	6.24074	Bgn	8.93785	Nrxn3	4.57833	Lamp1	3.9965	Lamp1	7.02626
Thbs1	2630.49	Itga9	402.561	Cd36	671.158	F11r	4966.47	Mfap2	10.189	Lamp1	3.58079	Cd81	2.50707	F11r	5.42928	Mdk	7.88649	Sdc2	4.44986	Sdc1	3.80697	Aplp2	6.83238
Col6a3	2512.28	Thbd	392.331	Aplp2	642.879	Crlf1	4711.89	Agt	8.94985	Eng	3.2727	Fgfr2	2.45363	F3	5.2783	Col1a2	7.06497	Robo2	4.24159	Cd81	3.50518	Rpsa	6.75651
Col4a1	2104.18	Aqp1	390.467	Sdc1	630.229	Aplp2	4524.47	Gnas	8.0512	Sdc2	2.8378	Cd9	2.34205	Itgb1	4.61403	Col3a1	6.78594	Robo1	3.84865	Itga9	3.43925	Pgrmc1	6.65956
Col4a2	2017.62	Cav1	377.8	Sort1	569.547	Aqp1	3925.74	Hmgb1	7.58764	Hhip	2.70661	Aplp2	2.31605	Crlf1	4.54232	Col1a1	5.46107	Mylk	3.63938	Aplp2	3.3826	Ptprm	5.02418
Fbn1	1970.85	Lgr6	373.061	Htr1b	503.787	Itgb1	3902.2	Mdk	7.47414	Robo2	2.61472	Sdc1	2.18353	Aqp1	4.3989	Mfap2	5.40988	Pdgfra	3.13954	Bcam	3.1869	Itgb1	4.44673
Cyr61	1584.12	Rpsa	369.108	Rpsa	455.137	Il18r1	3896.56	Col1a1	7.43262	Gpc4	2.54413	Ptprf	1.94972	Aplp2	3.89693	Calm1	5.19158	Lamp1	2.89815	Cd36	2.92424	Cd63	4.34136
Lamc1	1516.76	Lamp1	368.635	Fgfr2	399.219	F2r	3878.01	Spon2	7.00282	Maged1	2.42018	Nrp1	1.82966	Ptprm	3.76671	Hsp90b1	4.77907	Ror1	2.86553	Ptprm	2.87789	F3	4.31607
Col5a2	1485.99	Ptprs	358.45	Canx	398.442	Rpsa	3764.83	Col1a2	6.72093	Pdgfra	2.32168	Itgb1	1.59892	Cd63	3.60065	Serpine2	4.64658	Maged1	2.79628	Nrp1	2.87274	Itgb6	4.14748
Mmp2	1434.94	Mrc2	357.953	Dpp4	347.938	Ptprf	3424.33	Hsp90b1	6.42077	Nrxn3	1.79953	Itga9	1.46279	Itgb6	3.09489	Tnc	4.22352	Eng	2.57045	Ptprf	2.7409	Sdc1	3.65855
Timp2	1427.54	Boc	337.616	Cd63	333.364	Cd47	3330.48	P4hb	6.39682	Canx	1.75111	Adipor1	1.18312	Cd151	3.05715	Agt	4.02931	Cacna1c	2.50019	Cftr	1.84169	Fgfr2	3.58268
Serpine2	1222.3	Pdgfrb	325.812	Met	329.744	Cd151	3168.78	App	6.27264	Tgfbr3	1.65347	Canx	1.13979	Pgrmc1	2.26644	Calr	3.85818	Itga9	2.47209	Ror1	1.8046	Cd151	3.30028
Ltbp3	1091.36	F2r	318.537	Tfrc	327.629	Itga3	2980.55	Tnc	5.81453	Aplp2	1.5332	F11r	1.1026	Sdc1	2.1117	Hsp90aa1	3.51141	Plxna4	2.05756	Crlf1	1.60272	Esam	3.17805
Igfbp4	1045.56	Ddr2	301.831	Cd9	325.951	F3	2980.35	Calm2	5.29106	Nptn	1.4676	Dpp4	1.0849	Ptprf	2.06641	Cd34	3.44466	Aplp2	2.02294	Maged1	1.55843	Il18r1	3.07267
Gpc3	1002.81	Canx	288.001	Nrp1	316.55	Esam	2958.53	Col4a1	4.81147	Ramp2	1.39713	Ramp1	1.04157	Sdc4	1.9947	Arf1	3.29762	Tgfbr3	2.00186	Ptprg	1.51723	Maged1	3.06846
Gnas	945.949	Cd63	281.996	Sorl1	273.059	Pvrl3	2926.89	Col6a2	4.08192	Sdc4	1.34481	Cd47	1.02677	Esam	1.93431	Rarres2	3.23439	Gpc4	1.92357	Canx	1.43895	Cd74	2.97994
Vim	922.894	Gfra2	273.274	Cd81	270.89	Adipor1	2895	Cd34	3.98933	Cd44	1.31724	Ptprm	1.01232	Cd47	1.91355	Gnai2	3.09136	Nrcam	1.51959	Itgb1	1.41525	F11r	2.95887
Tnc	910.33	Fzd1	270.973	Lrp2	254.458	Adrb2	2851.36	Psap	3.79215	Cd151	1.25199	Sort1	0.844055	Canx	1.90411	App	3.06025	Canx	1.46137	Dpp4	1.40804	Egfr	2.65118
Timp3	902.292	Gpc4	268.344	F11r	247.34	Pvrl2	2537.85	Arf1	3.66637	Robo1	1.24699	Met	0.834667	Adipor1	1.90411	B2m	3.05222	Tnfrsf19	1.39161	Cacna1c	1.38126	Ptprf	2.38986
Ptma	873.623	Tgfbr3	266.022	Plxnb1	238.906	Canx	2373	Calm1	3.6056	Ddr2	1.21764	Maged1	0.827806	Il18r1	1.65879	Scgb1a1	3.01759	Pgrmc1	1.33641	Esam	1.25972	Adipor1	2.33085
Nid1	851.366	Ednra	244.698	Maged1	237.723	Ngfrap1	2344.65	Col6a1	3.34467	Tnfrsf1a	1.16124	Cftr	0.764073	Ocln	1.53801	Spon2	2.97243	Ramp2	1.3329	Adipor1	1.25663	Sdc4	2.2044
Angptl2	799.025	Sdc2	244.272	Erbb3	222.558	Nt5e	2290.36	Fbln1	3.31457	Tnfrsf19	1.11374	Crlf1	0.698715	Ddr1	1.49838	Rtn4	2.76416	Ddr2	1.23404	Sort1	1.13612	Lsr	2.04423
Lamb2	761.788	Plxnd1	244.037	Amfr	218.117	Lsr	2218.2	Mmp2	3.28132	Cacna1c	1.10139	Ror1	0.68373	Itga3	1.41535	Tgfb2	2.2859	Cd44	1.18536	Znrf3	1.12788	Canx	2.04423
Hsp90b1	733.053	Aplp2	244.024	Npr1	197.807	Sdc1	2191.7	Rarres2	3.26024	Nrcam	1.09599	Cacna1c	0.667481	Ramp1	1.37761	Psap	2.2593	F2r	1.17632	Lrp2	1.02591	Ghr	2.0063
Lamb1	703.348	Axl	243.075	Slc16a2	197.28	Ddr1	2189.3	Scgb1a1	3.12492	Ror1	1.09565	Ptprg	0.629205	Mrc2	1.19267	Timp2	2.2307	Igf1r	1.0875	Ghr	1.01045	Cd47	1.98522
App	644.017	Tgfbr2	238.766	Cd47	196.561	Nrp1	2165.57	Igfbp4	3.07656	Lpar1	1.05062	Tnfrsf1a	0.625594	Egfr	1.19267	Col4a1	2.21665	Ednra	1.07094	Cd47	0.984704	Tnfrsf12a	1.76183
Tgfb3	640.418	Ptch1	220.781	Notch2	196.421	Csf1r	2122.24	Wnt5a	2.99609	Ltbr	1.00789	Ltbr	0.620539	Sort1	1.16436	Uba52	2.1755	Itgav	1.06291	Met	0.951743	Tgfbr2	1.57216
Serping1	639.484	Itga8	219.793	Ldlr	193.439	Tnfrsf12a	2108.7	Rtn4	2.9703	Cd47	0.982672	Esam	0.595443	Il10rb	1.11152	Pdap1	2.041	Nrp1	1.01021	Cachd1	0.940413	Ocln	1.55952
Ntn1	604.104	Cd44	219.15	Adipor1	188.907	Abca1	2080.24	Thbs1	2.71977	Adipor1	0.978307	Cachd1	0.595262	Ltbr	1.09642	Col6a1	1.92558	Ptprm	0.975586	Tgfbr2	0.918783	F2r	1.52158
P4hb	598.104	Fgfr1	205.178	Lrp6	181.71	Fzd2	2072.36	Col4a2	2.6714	Itga9	0.930578	Cd151	0.586235	Ncstn	1.08699	Pkm	1.8217	Fgfr1	0.947482	Pgrmc1	0.82711	Nrp2	1.46258
Ctgf	575.085	Il6st	204.608	Kcnj15	179.957	Sort1	2065.96	Igf1	2.43913	Ncstn	0.919033	Ifnar2	0.553375	Maged1	1.07944	Col6a2	1.80513	Ptch1	0.942464	Ramp1	0.82608	Sort1	1.36142
Thbs2	563.803	Smo	203.77	Lrp5	179.698	Sdc4	2058.14	Col6a3	2.37705	Lrp1	0.918401	Epha7	0.514016	Lsr	0.998292	Fbln1	1.80263	Pth1r	0.859158	Lsr	0.82505	Ldlr	1.3277
Lama4	556.002	Igf2r	196.45	St14	178.266	Il10rb	2033.63	Apoe	2.2917	Pgrmc1	0.859702	Ldlr	0.501197	Tgfbr2	0.964324	Igf1	1.75746	Ifnar2	0.854641	Plxna4	0.80445	Ramp1	1.29398
Gas6	542.572	Dchs1	195.918	Crlf1	171.174	Ptprm	1936.61	Gstp1	2.26717	Cav1	0.854188	Tfrc	0.479893	Nptn	0.956775	P4hb	1.74542	Ptprg	0.844604	Aqp1	0.80342	Plxna4	1.26447
Hspg2	541.438	Bmpr1a	188.227	Aqp1	165.714	Cd74	1887.81	Pltp	2.1102	Gfra2	0.846434	Lrp2	0.456602	Nrp2	0.936017	Col4a2	1.70828	Ldlr	0.839084	F11r	0.784879	Il10rb	1.25604
Dcn	525.302	Ephb3	186.18	Il6st	164.104	Itgb6	1874.82	Serping1	2.10118	Plxna4	0.843103	Slc16a2	0.45588	Nrp1	0.919033	Plat	1.69071	Adipor1	0.838582	Itga6	0.760159	Mrc2	1.1591
Fn1	502.961	Ghr	184.438	Plxnb2	161.754	Igf1r	1821.15	Col5a2	2.0469	Ifnar2	0.758614	Atp6ap2	0.454977	Cldn4	0.917146	Fbn1	1.64153	Ptpra	0.815497	Bambi	0.753979	Nrp1	1.06216
Calr	482.736	Plxnb2	172.612	Bmpr2	159.271	Ocln	1727.92	Fbn1	2.03565	Fgfr1	0.739431	Nptn	0.447936	Tnfrsf12a	0.85487	Angptl2	1.63451	Ptprs	0.790405	Epha4	0.740588	Ddr1	1.06216
Apoe	451.281	Sdc4	161.651	Tgfbr2	158.817	Plxna1	1722.24	Col5a1	1.9565	Mgrn1	0.739201	Lsr	0.444686	Ghr	0.852983	Mmp2	1.37305	Bmpr2	0.777859	Cd44	0.722048	Fzd2	1.02001
Psap	445.383	Lrp6	158.716	Lifr	148.699	Plxnb2	1581.05	Mfge8	1.88275	Ramp1	0.737995	Bambi	0.443422	Ifngr2	0.745417	Mfge8	1.37004	Ror2	0.776855	Cd151	0.718958	Itga9	0.990505
Col14a1	425.464	Eng	154.633	Esam	139.292	Tgfbr2	1579.49	Calr	1.77161	Ednra	0.724555	Sorl1	0.441256	Adrb2	0.726545	Igfbp4	1.36803	Lpar1	0.774848	Kcnj15	0.679817	Ptprd	0.97786
Agt	416.591	Nrp1	152.456	Ptprg	137.705	Amfr	1544.11	Hsp90aa1	1.77127	Nrp1	0.702385	Plxnb2	0.43945	Fgfr2	0.671819	Sema6d	1.36351	Ptprd	0.751763	Epha7	0.646856	Itga3	0.965215
Gdf10	409.824	Amfr	146.579	Bmpr1a	136.836	Mrc2	1476.4	Mfap5	1.72026	Itgav	0.697847	Il10rb	0.42284	St14	0.654834	Pros1	1.30128	Fzd1	0.744235	Slc16a2	0.629346	Amfr	0.948356
Lama2	399.89	Fzd2	145.94	Itga3	133.658	Sorl1	1390.13	Timp3	1.69878	Ifngr1	0.696641	Kcnj15	0.418507	Nt5e	0.622753	Lpl	1.27268	Bmpr1a	0.742228	Sorl1	0.624195	Atp6ap2	0.897777
Fbln1	391.053	Igf1r	143.599	Ncstn	132.376	Vldlr	1297.05	Tgfb2	1.66829	Itga1	0.658676	St14	0.410202	Bmpr2	0.618979	Lamc1	1.24257	Cd151	0.717638	Amfr	0.614925	Neo1	0.851413
Lama5	389.205	Npr2	143.192	Il18r1	124.867	Atp6ap2	1244.38	Sema3c	1.60545	Atp6ap2	0.658159	Plxna4	0.384745	Fzd2	0.613318	Col5a2	1.2235	Unc5b	0.713623	Il18r1	0.610805	Bmpr1a	0.851413
Gnai2	385.091	Notch3	143.025	Fzd7	123.322	Ifngr1	1202.64	Pros1	1.5896	Thbd	0.642709	Tgfbr2	0.384023	Ifnar2	0.549155	Efemp2	1.21547	Prokr2	0.713121	Atp6ap2	0.605655	Bmpr2	0.767114
Sema3c	369.31	Robo1	141.774	Adipor2	123.046	Nptn	1168.75	Timp2	1.57197	Bmpr2	0.618815	Adora2b	0.378967	Plxnb2	0.547268	Wnt5a	1.16227	Aqp1	0.708604	Tfrc	0.564454	Ltbr	0.750255
Mfap2	367.896	Neo1	139.343	Ltbr	113.854	Nrp2	1162.3	Lamc1	1.54664	F2r	0.614278	Bmpr2	0.378064	Amfr	0.541607	Timp3	1.15625	Pdgfrb	0.701579	Bmpr1a	0.563424	Znrf3	0.72918
C3	355.981	Cd47	139.33	Ptprm	113.716	Ltbr	1114.01	Pkm	1.50735	Lgr6	0.567927	Ncstn	0.373009	Mgrn1	0.537832	Col6a3	1.14119	Itga1	0.699571	Bmpr2	0.529433	Itgav	0.695461
Igf1	334.257	Bmpr2	139.292	Igf2r	113.246	Fzd1	1057.24	Efemp2	1.47938	Pdgfrb	0.558278	Adcy7	0.36651	Atp6ap2	0.532171	Apoe	1.07495	Lrp1	0.696058	Ramp2	0.523253	Csf1r	0.682816
Arf1	325.673	Notch2	135.819	Epha2	112.602	Bmpr1a	1018.26	B2m	1.44325	Tnfrsf12a	0.554315	Tspan1	0.362357	F2r	0.528397	Vasp	1.02176	Mgrn1	0.678996	Ifnar2	0.516043	Igf1r	0.678555
Pltp	310.019	Lpar1	134.356	Insr	112.151	Maged1	998.166	Angptl2	1.33292	Ptprm	0.520715	Mgrn1	0.359107	Epha4	0.524622	Thbs1	0.970567	Sdc4	0.677992	Ldlr	0.509863	Slc37a1	0.653312
Calm3	295.904	Itgb5	130.262	Npr2	111.963	Ghr	996.648	Lama4	1.30052	Ptpra	0.51342	Cd82	0.333469	Ramp2	0.507638	Bmp5	0.927409	Tnfrsf1a	0.673977	Tnfrsf1a	0.498532	Gpc4	0.602733
Rtn4	271.161	Nptn	128.293	Vldlr	111.545	Bmpr2	987.667	Plat	1.27761	Ptprs	0.508308	Adipor2	0.331845	Sorl1	0.50009	Bmp4	0.927409	Nptn	0.667453	Plxna2	0.459391	Sorl1	0.598518
Mdk	259.594	Lrp4	128.035	Plxna1	108.163	St14	950.139	Fn1	1.16469	Cd9	0.503828	Il18r1	0.323539	Bmpr1a	0.484993	Lama2	0.889269	Atp6ap2	0.655409	Adcy7	0.451151	Lrp6	0.598518
Cd34	246.93	Sdc3	127.781	Pgrmc1	106.966	Ncstn	944.273	Gnai2	1.12776	Tgfbr2	0.501933	Amfr	0.31704	Gpc4	0.483105	Sema3c	0.874715	Adcy7	0.649889	Adora2b	0.448061	Mgrn1	0.573228
Calm2	246.654	Sort1	126.596	Atp6ap2	105.428	Epha2	927.614	Podxl2	1.05246	Fzd1	0.48407	Ogfr	0.311082	Fzd1	0.479331	Fn1	0.873711	Cd47	0.62028	Gpihbp1	0.444971	Ifnar2	0.564799
Hspa1a	239.117	Pgrmc1	125.297	Cav1	103.976	Erbb3	904.311	Ecm1	1.02202	Ednrb	0.47959	Lrp6	0.310901	Ifngr1	0.479331	Angptl4	0.850125	Tgfbr2	0.612752	Lifr	0.443941	Ogfr	0.556369
Spon2	236.569	Lrp5	125.17	Nptn	98.6497	Egfr	890.122	Calm3	1.02133	Ntrk3	0.475685	Cd44	0.309998	Plxna1	0.477444	Tgfb3	0.791409	Smo	0.598701	Ltbr	0.428491	Ifngr2	0.556369
Tgm2	227.405	Unc5b	121.615	Plxna2	98.621	Plxnb1	874.423	Pdap1	1.01851	Ptch1	0.459143	Znrf3	0.307651	Itga9	0.469896	Fgf18	0.787896	Neo1	0.597195	Cav1	0.40377	Ifngr1	0.552154
Plat	226.166	Ifnar1	120.609	Adcy7	96.125	Ogfr	828.137	Tgfb3	0.996801	Igf1r	0.45518	Ifngr1	0.30061	Tnfrsf1a	0.46046	Sftpa1	0.780368	Gfra2	0.596191	Cd82	0.39759	Cacna1c	0.526864
Pros1	225.986	Ntrk3	119.546	Mrc2	95.8128	Notch2	816.616	Vcan	0.986463	Adcy7	0.427611	Ghr	0.299527	Slc37a1	0.458573	Lamb1	0.779866	Hhip	0.58766	Lrp6	0.39553	Ramp2	0.522649
Npnt	223.026	Tnfrsf1a	119.369	Tnfrsf1a	93.7095	Neo1	808.272	Nid1	0.981179	Ror2	0.423648	Npr1	0.293027	Erap1	0.437814	Pltp	0.76732	Kcnq5	0.58214	Neo1	0.381109	Ptprg	0.518434
Wnt5a	215.043	Cacna1c	119.037	Kidins220	90.9633	Itgav	801.033	Lamb1	0.956309	Bambi	0.406532	Il6st	0.284	Kidins220	0.413282	Tfpi	0.757283	Itgb5	0.57963	Kcnq1	0.380079	Cachd1	0.50579
Pkm	204.814	Plxna1	117.639	Fzd1	88.2651	Scarf1	778.852	Serpine1	0.926902	Plxna2	0.395389	Itgav	0.269556	Itgav	0.413282	Nid1	0.750759	Cav1	0.568088	Il10rb	0.371839	Epha4	0.49736
Slit3	202.105	Itgav	116.221	Plxna4	84.6758	Slc37a1	766.724	Bmp4	0.920526	Ifngr2	0.370519	Vldlr	0.260709	Neo1	0.403846	Pon2	0.749254	Sdc1	0.552029	Tspan1	0.366689	Adipor2	0.4805
Calm1	200.806	Ncstn	115.816	Erap1	81.6699	Tnfrsf21	753.421	Lrpap1	0.860219	Amfr	0.366097	Bmpr1a	0.252946	Igf2r	0.369878	Lrpap1	0.741726	Tgfbr1	0.537476	Tnfrsf12a	0.361539	Nptn	0.476285
Sema5a	190.726	Bcam	115.155	Cftr	80.9042	Ptch1	728.406	Angptl4	0.812202	Met	0.353116	Ramp2	0.252765	Plxna4	0.362329	Podxl2	0.727173	Ltbr	0.531453	Itgav	0.360509	Gpihbp1	0.476285
B2m	184.285	Ltbr	114.256	Tgfbr1	80.6281	Kidins220	728.354	Wnt11	0.79882	Bmpr1a	0.349326	Plxna2	0.250599	Cachd1	0.356668	Col5a1	0.71814	Plgrkt	0.504354	Notch2	0.355359	Atrn	0.463641
Tgfb2	181.966	Ednrb	111.189	Cachd1	77.0244	Mgrn1	720.035	Efnb1	0.746151	Tmem222	0.34272	Tnfrsf12a	0.249876	Itgb3	0.354781	Serping1	0.687527	Bambi	0.501845	Mgrn1	0.345059	St14	0.455211
Efnb2	178.036	Plxnc1	108.204	Neo1	76.8872	Ifngr2	685.424	Vasp	0.739603	Il6st	0.338757	Erap1	0.23796	Ogfr	0.349119	Efnb1	0.660929	Ifngr1	0.49783	Nrp2	0.344028	Ptpra	0.442566
Lpl	176.161	Gpc1	108.01	Ramp1	74.9171	Igf2r	683.577	Tcn2	0.703591	Pde1a	0.337551	Ifngr2	0.23778	Adipor2	0.337796	Lama4	0.659926	Boc	0.489298	Adipor2	0.342998	Itgb5	0.429921
Mfap5	174.228	P2ry14	107.707	Cd44	73.0342	Ephb3	678.097	Tfpi	0.69779	Jmjd6	0.335081	Lrp5	0.235613	Plxnb1	0.330248	Calm3	0.647379	Epha3	0.472236	Gpc4	0.340938	Notch2	0.417277
Mfge8	172.019	Adcy7	106.788	Fzd5	72.1908	Acvr2b	648.605	Pon2	0.693252	Ptprg	0.324284	Itga6	0.233627	Tmem222	0.324586	Adam10	0.641357	Axl	0.471232	Insr	0.337848	Acvr2b	0.417277
C4b	168.845	Tnfrsf19	103.716	Acvr2a	71.0412	Fgfr2	642.404	Gas6	0.667061	Cntfr	0.319344	Lifr	0.2311	Ephb3	0.320812	Gstp1	0.539985	Fxyd6	0.460693	Ptpra	0.335788	Ptch1	0.387772
Hsp90aa1	157.188	Ptprf	102.914	Bambi	70.8556	Adipor2	612.325	Penk	0.645465	Ifnar1	0.314347	Insr	0.220628	Abca1	0.307602	Tcn2	0.5169	Ednrb	0.45718	St14	0.330638	Cd82	0.387772
Agrn	152.339	Cd9	102.123	Cd151	67.9003	Itgb3	603.459	Ltbp3	0.59406	Tgfbr1	0.311762	Ocln	0.218822	Ifnar1	0.305715	Icam1	0.509372	Amfr	0.449151	Nptn	0.326518	Fzd1	0.375127
Rps19	145.375	Plxna4	100.931	Abca1	66.696	Ramp1	595.739	Bmp2	0.576715	Igf2r	0.310441	Epha4	0.205823	Ptch1	0.301941	Vcan	0.502848	Plxna2	0.44614	Igf1r	0.313128	Cldn4	0.375127
Bmp5	143.022	Robo2	100.75	Atrn	66.0251	Amhr2	576.791	Thbs2	0.569076	Ogfr	0.302343	Erbb3	0.202032	Robo1	0.294392	Adam12	0.490302	Cd9	0.423557	Plxnb2	0.303858	Slc16a2	0.362483
Nlgn2	138.916	Kidins220	94.4661	Cdh5	63.6756	Il6st	571.843	Lama2	0.549318	Ptprd	0.300677	Gpc4	0.196615	Tgfbr1	0.281182	Hras	0.479262	Acvr1	0.422051	Ifngr1	0.301797	Erbb3	0.358268
Wnt11	130	Fzd7	94.3645	Itga6	63.3953	Itgb5	550.807	Lamb2	0.538462	Ephb3	0.298839	Tgfbr1	0.19499	Ptprg	0.279295	Ltbp3	0.47876	Tnfrsf12a	0.421549	Tgfbr1	0.296647	Tmem222	0.341408
Col4a5	128.848	Ackr3	93.2061	Mgrn1	63.0957	Epha4	546.603	Adam10	0.533178	Boc	0.296255	Notch2	0.19156	Erbb3	0.277408	Rims1	0.467217	Ogfr	0.411513	Atrn	0.295617	Plxnb2	0.341408
Lamc3	124.651	Sorl1	91.2596	Ifnar1	62.0218	Erbb2	540.645	Cxcl1	0.520485	Plgrkt	0.294244	Cldn4	0.19156	F2rl1	0.273634	Mfap5	0.456177	Lrp4	0.411011	Gpr39	0.284287	Kidins220	0.341408
Fat4	121.064	Ptprd	88.8638	Cd82	61.614	Fgfrl1	518.649	Nlgn1	0.516235	Fgfr2	0.292579	Pgrmc1	0.18831	Cd82	0.271747	Yars	0.437608	Notch2	0.397461	Il6st	0.279137	Insr	0.324548
Vcan	117.331	Itga5	85.8973	Ptch1	60.6157	Ifnar2	504.659	Bmp5	0.502163	Axl	0.28942	Plgrkt	0.180185	Ldlr	0.267973	Gpc3	0.415527	Insr	0.39445	Lrp5	0.275017	Erap1	0.324548
Efnb1	111.515	Tgfbr1	85.8119	Acvr1b	60.5819	Lrp6	494.108	Tnfsf12	0.494983	Egfr	0.287467	Il31ra	0.177477	Cacna1c	0.249101	Qdpr	0.402981	Hmmr	0.392442	Npr1	0.273987	Ncstn	0.311904
Efemp2	109.49	Mgrn1	84.5418	Ghr	59.4584	Ccrl2	482.014	Qdpr	0.474364	Lifr	0.28672	Kcnq1	0.176936	Il6st	0.241553	Ntng2	0.38893	Cachd1	0.381904	Tmem222	0.272957	Epha2	0.311904
Vasp	106.157	Lepr	83.6059	Il10rb	58.9647	Itga9	462.161	Sema6d	0.471549	Unc5b	0.272017	Neo1	0.175491	Lrp6	0.237778	Wnt11	0.387424	Pde1a	0.376885	Ogfr	0.268837	Nt5e	0.307689
Grem1	105.159	Ptpra	81.4506	Pvr	56.7725	Plxna4	456.477	Icam1	0.454261	Acvr2a	0.270983	Igf2r	0.173505	Cd36	0.237778	Tgfb1	0.376885	Ramp1	0.361328	Erbb3	0.266777	Tnfrsf1a	0.303474
Lrpap1	103.904	Ldlr	78.0833	Smo	55.5435	Cd82	440.607	Yars	0.441395	Acvrl1	0.270179	Acvr2a	0.172603	Plgrkt	0.235891	Sema5a	0.367852	Znrf3	0.350287	Acvr1	0.263687	Igf2r	0.299259
Adam9	96.1084	Mcam	76.853	Celsr1	55.4799	Ifnar1	438.822	Hspa1a	0.437892	Smo	0.262884	Tnfrsf9	0.172061	Insr	0.232117	Slit2	0.366848	Atrn	0.348782	Plgrkt	0.256476	Plxna2	0.295044
Rarres2	96.0195	Apcdd1	75.9081	Ephb3	54.5213	Ifnlr1	427.862	Col14a1	0.433354	Neo1	0.260185	Cav1	0.167006	Vldlr	0.228343	Nlgn1	0.360826	Ntrk3	0.344767	Robo1	0.251326	Itgb3	0.290829
Ace	93.4757	Atp6ap2	75.4522	Itgav	54.4227	Fgfr3	424.952	Efnb2	0.413884	Plxnc1	0.25312	Slc37a1	0.1652	Atrn	0.228343	Nrtn	0.332723	Acvrl1	0.340752	Robo2	0.250296	Ifnar1	0.286614
Scgb1a1	92.8067	Fzd4	74.6711	Mylk	54.404	Tmem222	415.672	Rims1	0.405326	Sdc1	0.252718	Il17rc	0.164478	Igf1r	0.226707	Efna5	0.330716	Lrp6	0.333727	Tlr4	0.247206	Plgrkt	0.282399
Cxcl12	92.3708	Kremen1	73.7273	F2r	53.1081	Lrp4	413.861	Fgf7	0.401305	Plxnb2	0.244562	Mylk	0.156534	Epha1	0.218907	Tnfsf12	0.330214	Lgr6	0.32921	Acvr2a	0.246176	Dcbld2	0.278184
Podxl2	89.9881	Il1rap	71.148	Erbb2	53.0892	Ptpra	408.635	Gdf10	0.393609	Epha3	0.240484	Celsr1	0.153465	Calcrl	0.21702	Hebp1	0.307631	Lifr	0.327203	Vldlr	0.243086	Adrb2	0.278184
Bmp3	87.633	Lifr	68.8554	Ogfr	52.8902	Insr	405.013	Dcn	0.369371	Lrp4	0.233879	Tmem222	0.152742	Amhr2	0.215133	Efnb2	0.29107	Il6st	0.326199	Pecam1	0.234846	Plxna1	0.273969
Fbln2	81.8775	Abca1	68.3255	Epha7	52.6779	Plgrkt	402.726	Sftpa1	0.358745	Kcnq5	0.227676	Plxnb1	0.151479	Slc16a2	0.211359	Bmp2	0.290568	Ifngr2	0.318169	Celsr1	0.233816	Tgfbr1	0.269755
Vcam1	80.2832	Ror2	67.784	Ifngr1	51.8576	Dpp4	393.392	Gpc3	0.355931	Kidins220	0.227044	Kidins220	0.150756	Sdc2	0.211359	Angpt2	0.289062	Tmem222	0.314155	Slc37a1	0.232786	Ephb3	0.269755
Anxa1	79.8323	Cmklr1	66.9068	Notch1	49.1792	Tnfrsf4	388.923	Ptdss1	0.352887	Lrp6	0.226872	Pvr	0.144257	Plxna2	0.211359	Slit3	0.288561	Plxnc1	0.313653	Ocln	0.230726	Pvr	0.26554
Sema3d	77.2307	Il1r1	66.0729	Thbd	48.9934	Jmjd6	388.908	Adam15	0.347373	Cachd1	0.226355	F2rl1	0.135771	Lrp4	0.211359	Ecm1	0.28304	Mrc2	0.308634	Mylk	0.225576	Smo	0.261325
Igf2	77.0499	Acvr2a	64.9155	Itga7	48.7875	Nrxn2	386.387	Ntn4	0.346798	Bcam	0.224862	Itga3	0.129271	Il31ra	0.209472	Gas6	0.280029	Gpihbp1	0.30211	Ptch1	0.223516	Il17rc	0.24868
Ntn4	76.7421	Plxnb1	64.8598	Osmr	48.2354	Il17rc	385.698	Cxcl10	0.333646	Pth1r	0.219233	Calcrl	0.126924	Csf1r	0.209472	Sorbs1	0.279527	Acvr2a	0.296088	Pvr	0.218365	Plxnb1	0.244465
Fgf18	76.0491	Ntrk2	63.6556	Znrf3	45.1858	Npr2	368.713	Cp	0.326581	Itga5	0.213834	Osmr	0.124397	Jmjd6	0.205697	Psen1	0.279527	Fzd2	0.295085	Kcnq5	0.213215	Fzd6	0.24025
Vegfa	75.7134	Itga1	62.2309	Cd93	44.9242	Dcbld2	365.206	Tgfb1	0.310729	Ephb4	0.211709	Notch1	0.124035	Notch2	0.201923	Serpine1	0.274509	Itga5	0.289062	Sdc2	0.211155	Sdc2	0.24025
Adam10	75.3068	Atrn	60.8427	Itga1	44.6527	Fzd5	341.438	Lama5	0.308661	Mcam	0.211537	Scarb1	0.123494	Dcbld2	0.201923	Lin7c	0.272	Jmjd6	0.283542	Eng	0.209095	Pecam1	0.236035
Ltbp1	75.0195	Acvrl1	58.696	Ephb4	44.4327	Plxna2	335.06	Lin7c	0.298208	Ccrl2	0.210905	Nrp2	0.122411	Il17rc	0.198149	Lama5	0.269992	Thbd	0.281535	Osmr	0.203945	Lrp4	0.236035
Gstp1	74.5889	Egfr	58.3535	Lrp4	43.7083	Pld2	327.702	Psen1	0.297059	Itgb5	0.209182	Jmjd6	0.121688	Acvr2b	0.194374	Sema4c	0.266981	Il1rap	0.277018	Smo	0.200855	Lmbr1l	0.227605
Angptl4	72.6309	Pth1r	57.9218	Ptprb	43.5364	Atrn	327.274	Sema4c	0.296887	S1pr1	0.208952	Acvr1	0.121688	Erbb2	0.188713	Itgb3bp	0.264974	Nt5e	0.269491	Dcbld2	0.199825	Cdh5	0.227605
Icam1	70.469	Epha3	56.6344	Fzd6	43.1989	Slc16a2	319.807	Hspg2	0.295738	Il1rap	0.20878	Ephb4	0.120786	Znrf3	0.181165	Nucb2	0.257948	Traf3	0.26397	Ptprs	0.193645	Abca1	0.227605
Sema6d	65.8186	Nrcam	56.5992	Igf1r	43.1618	Tgfbr1	317.482	Nrtn	0.288271	Slc40a1	0.207057	Robo1	0.120425	Csf2ra	0.179277	Ptdss1	0.25293	Npr3	0.259955	F2r	0.191585	Mylk	0.22339
Nid2	65.6316	Adipor1	55.1486	Adora2b	42.9831	Tnfrsf1a	312.967	C1qtnf1	0.286203	Slc16a2	0.205563	Ifnar1	0.120063	Mylk	0.173616	Timp1	0.249417	Met	0.257446	Ephb4	0.188495	Jmjd6	0.22339
Uba52	65.2655	Vldlr	52.7694	Kremen1	41.6788	Znrf3	308.381	Lpl	0.270581	Il10rb	0.202462	Egfr	0.116453	Acvr2a	0.173616	Adam15	0.243896	Mcam	0.251926	Kidins220	0.186435	Acvr2a	0.22339
Angpt1	64.1685	Ogfr	52.3761	Epha1	41.3977	Gpc4	303.592	Angpt2	0.263976	Ldlr	0.197809	Erbb2	0.111578	Ifitm1	0.171729	Nlgn2	0.241889	Slc16a2	0.244398	Unc5d	0.184375	Adcy9	0.219176
Fgf2	63.9029	Ifngr1	51.2804	Il13ra1	40.4922	Adcy9	299.181	Angpt1	0.261046	Acvr1	0.197637	Ptpra	0.110675	Eng	0.169842	Wnt4	0.232856	Ephb4	0.237372	Scarb1	0.182314	Lyve1	0.214961
Lin7c	63.2368	Ptprg	50.5945	Fzd8	40.191	Slc45a3	296.468	Slit2	0.257313	Mrc2	0.19758	Atrn	0.110494	Fgfr3	0.167955	Lamb2	0.227336	Sort1	0.23135	Cdh5	0.180254	Il6st	0.214961
Bmp4	62.2157	Ror1	50.2421	Gpc4	39.795	Epha1	296.268	Ntn1	0.254212	Insr	0.195972	Itga1	0.106884	Epha2	0.166068	Ntn1	0.223823	Esam	0.228841	Flt1	0.179224	Fgfr3	0.210746
Col4a6	62.0012	Ptprm	49.3754	Fzd2	39.6399	F2rl1	287.387	Bdnf	0.247032	Il1r1	0.193329	Tlr4	0.1058	Lrp5	0.162293	Cp	0.222317	Il1r1	0.223321	Fzd1	0.178194	Itga1	0.210746
Adam15	60.2758	Cd151	47.656	Slc37a1	39.6355	Traf2	284.496	Sema5a	0.235373	Ackr3	0.192698	Hfe	0.103453	Fzd6	0.160406	Ltbp1	0.219808	Ifnar1	0.218302	Il17rc	0.174074	Fgfrl1	0.210746
Hmgb1	58.5164	Sdc1	47.368	Ror1	39.1816	Pvr	284.252	Adam9	0.229629	Sort1	0.191434	Epha1	0.102731	Tlr5	0.160406	Ibsp	0.217801	Egfr	0.214789	Tnfrsf11a	0.173044	Eng	0.206531
Ntng2	58.4425	Cd74	46.7628	Egfr	39.1627	Tspan1	271.625	Fgf18	0.228308	Sdc3	0.187069	Ptch1	0.101648	Itgb5	0.158519	Thbs2	0.216797	Lmbr1l	0.210775	Acvrl1	0.168924	Plaur	0.202316
Col18a1	55.9126	Col13a1	46.0076	Lrp1	38.644	Erap1	267.659	Adam12	0.218946	Fxyd6	0.185346	Il1r1	0.0994812	Itga6	0.154745	Anxa1	0.216797	Fgfr4	0.209269	Calcrl	0.167894	F2rl1	0.202316
Ecm1	55.7465	Cntfr	45.6576	Ephb6	38.4773	Lrp5	253.698	Scgb3a2	0.218142	Cd74	0.179947	Fzd1	0.0989395	Ifnlr1	0.154745	Cxcl12	0.204753	Kidins220	0.20676	Ifngr2	0.166864	Fzd3	0.193886
Nucb2	55.0361	Fgfr3	45.5053	Scarb1	37.2219	Lmbr1l	251.392	Nucb2	0.21125	Lrp5	0.178784	Traf2	0.0976757	Pld2	0.149083	Adam17	0.195719	Bcam	0.204251	Itga3	0.162744	Robo1	0.193886
Tnfsf12	54.9214	Fgfr4	45.3263	Il1r1	36.7361	Smo	243.501	Sorbs1	0.210847	Fzd2	0.177592	Epha2	0.096773	Gpihbp1	0.149083	Eda	0.194214	Igf2r	0.203247	Jmjd6	0.159654	Ptprb	0.193886
Clec11a	54.6801	Ephb4	45.1608	Lyve1	36.0371	Fzd6	231.259	Timp1	0.207401	Fas	0.173859	Fzd6	0.0960508	Kremen1	0.147196	Tslp	0.193712	Fgfr2	0.202921	Egfr	0.159654	Itga6	0.193886
Serpine1	54.5153	Slc40a1	45.0655	Calcrl	35.9392	Fzd7	223.11	C1qtnf5	0.196833	Adipor2	0.169723	Ifitm1	0.0960508	Ephb4	0.147196	Angpt1	0.193712	Pla2r1	0.200236	Npy2r	0.157594	Traf3	0.189671
Rbp4	54.2393	Slc16a2	44.7223	Dcbld2	35.423	Cd36	222.318	Pgf	0.186495	Il3ra	0.168747	Il13ra1	0.0929815	Pvr	0.143422	Adam9	0.190199	Lrp5	0.199402	Fzd2	0.153474	Scarf1	0.185456
C1qtnf1	50.2455	Insr	44.6288	Cacna1c	35.0913	Csf2ra	219.998	Ccl2	0.186035	Dchs1	0.167656	Igf1r	0.0928009	Plaur	0.143422	Hspg2	0.189697	Adipor2	0.194214	Ptprb	0.149354	Pld2	0.185456
Tgfb1	49.1961	Plxna2	44.1795	Nrp2	34.698	Cachd1	217.12	Vegfa	0.180119	Ddr1	0.161969	Adrb2	0.0918982	Fgfrl1	0.141535	Sema6a	0.186686	Epha4	0.192708	Mertk	0.149354	Ptprs	0.181241
Cfh	48.8022	Tnfrsf12a	43.0327	Sdc2	34.4946	Ptprd	216.145	Adam17	0.178913	Atrn	0.158696	Acvr1b	0.0918982	Ptpra	0.139648	Efna4	0.182671	Itgb8	0.191705	Epha2	0.147294	Ifnlr1	0.177026
Csf1	48.7396	Agtr2	40.5258	Ptpra	33.3526	Sdc2	207.379	Efna4	0.178052	Gpc1	0.156973	Npr2	0.0870234	Ptprs	0.135873	Ntn4	0.18217	Cd74	0.189697	Fzd6	0.145234	Slc45a3	0.172811
Psen1	48.1899	Cdon	38.8094	Lsr	33.0881	Kremen1	206.334	Rgmb	0.177075	Pla2r1	0.154905	Fgfr3	0.0855791	Traf2	0.133986	Col14a1	0.176147	Calcrl	0.187188	Notch1	0.143174	Ephb4	0.172811
Yars	46.991	Fgfr2	38.5362	Itgb6	33.0576	Ephb4	205.339	Ltbp1	0.167885	F3	0.154733	Ddr1	0.085218	Scarf1	0.132099	Vegfb	0.174642	Pecam1	0.186184	Ncstn	0.143174	Acvrl1	0.172811
Nov	46.2117	Notch1	38.0966	Pdgfra	32.6793	Npr1	204.465	Fgf10	0.163077	Ifitm1	0.15456	Sdc2	0.0850374	Pecam1	0.132099	Vegfa	0.172635	Apcdd1	0.184679	Lyve1	0.143174	Acvr1	0.172811
Rgmb	45.3284	F3	37.9909	Ocln	32.5365	Il17ra	193.301	Npnt	0.162601	Npr3	0.153067	Fzd7	0.0835931	Il13ra1	0.126438	Farp2	0.169122	Ncstn	0.184177	Il1rap	0.143174	Il1r1	0.164382
Pgf	43.4455	Met	37.9647	Tlr4	32.3654	Il1r1	187.972	Cxcl12	0.160993	Notch2	0.146175	Cckar	0.083232	Slc45a3	0.124551	Ccl25	0.164605	Dcbld2	0.181668	Erap1	0.142144	Epha1	0.164382
Pdap1	42.3196	Ifngr2	36.3335	F2rl1	32.0087	Robo1	182.8	Hras	0.154847	Plscr4	0.145256	Pecam1	0.0826903	Il1r1	0.124551	Npnt	0.158583	Scarb1	0.177151	Igf2r	0.141113	Kcnq5	0.160167
Angpt2	40.5979	S1pr3	36.1281	Pdgfrb	30.105	Ldlr	182.326	Pdgfa	0.150999	Abca1	0.143762	Tnfrsf11a	0.0819681	Tnfrsf4	0.122664	Icam2	0.157077	S1pr1	0.176147	Il13ra1	0.138023	Thbd	0.155952
Fgf10	40.1702	Unc5c	35.3971	Kcnq1	28.6145	Ptprs	181.928	Ace	0.148415	Lmbr1l	0.142901	Csf2ra	0.0781767	Fzd5	0.120776	Dcn	0.156074	Dchs1	0.174642	Cd93	0.138023	Lrp5	0.151737
Sema4c	40.1153	Cachd1	35.1232	Plxnd1	28.0097	Acvr2a	179.125	Ndp	0.146404	Il13ra1	0.141522	Smo	0.0774545	Smo	0.115115	Fgf10	0.153122	Fzd3	0.173638	Lrp4	0.135963	Cd36	0.151737
Ptdss1	39.3267	Dcbld2	34.4819	Fgfr3	27.8365	Mylk	173.66	Cxcl16	0.14336	Calcrl	0.140086	Lpar3	0.0749268	Npr2	0.113228	Ace	0.152059	Ephb3	0.171631	Mrc2	0.132873	Ccrl2	0.151737
Slit2	39.0044	Plscr4	34.3264	Ptprs	27.4861	Thbd	171.548	Anxa1	0.140201	Scarb1	0.136927	Fzd5	0.0747463	Itga1	0.113228	Nampt	0.139513	Plxnb2	0.156575	Il1r1	0.130813	Calcrl	0.147522
