# Supplementary material for: Decoding the IGF1 signaling gene regulatory network behind alveologenesis from a mouse model of bronchopulmonary dysplasia
Source: eLife. 2022 Oct 10;11:e77522. doi: 10.7554/eLife.77522 (PMC9581530; doi:10.7554/eLife.77522)
Supplement: Figure 4—source data 2. [file elife-77522-fig4-data2.xlsx]

## Sheet: Table 3
Chemical	Concentration used in literature	Literature	Concentration tested	Concentration used in paper
PPP	0.1-10uM	Jin et al., 2018	0.5, 2, 4, 8 uM	4uM
	10uM	Chen et al., 2017
	20uM	Wang et al., 2019
Infigratinib	0.5uM	Nakamura et al., 2015	0.1, 1, 10 uM	1uM
	1.0uM	Wong et al., 2018
	1.5uM	Manchado et al., 2016
siWnt5a	20nM	Nemoto et al., 2012	10, 20, 40 nM	20nM
	20nM	Sakisaka et al., 2015
	100nM	Zhao et al., 2017
siFoxd1	20nM	Nakayama et al., 2015	10, 20, 40 nM	20nM
	20nM	Wu et al., 2018
	100nM	Li et al., 2021
