# Supplementary material for: Decoding the IGF1 signaling gene regulatory network behind alveologenesis from a mouse model of bronchopulmonary dysplasia
Source: eLife. 2022 Oct 10;11:e77522. doi: 10.7554/eLife.77522 (PMC9581530; doi:10.7554/eLife.77522)
Supplement: Figure 6—source data 1. [file elife-77522-fig6-data1.xlsx]

## Sheet: Table 4
Sample ID	Group	Phenotype	Diagnosis	GA at Birth (wk)	GA at Death (wk)
#30	non-BPD	Control	HIE, NLD	38.5	38.6
#50		Control	HIE, NLD	41	41.4
#52		Control	HIE, NLD to very mild RDS	24.5	26.1
#56		Control	NLD to very mild RDS, central line event	26.6	28.5
#11	BPD	BPD	BPD; necrotizing enterocolitis	26	34.1
#14		BPD	BPD; necrotizing enterocolitis	26	28.4
#17		BPD	BPD; cytomegalovirus +	25	34.1
#18		BPD	BPD	27	40.7
#44		BPD	BPD	28	45
Definition of abbreviations: BPD = bronchopulmonary dysplasia; GA = gestational age; HIE = hypoxic ischemic encephalopathy; NLD = no lung disease; RDS = respiratory distress syndrome.
