# Supplementary material for: Decoding the IGF1 signaling gene regulatory network behind alveologenesis from a mouse model of bronchopulmonary dysplasia
Source: eLife journal article supplement (doi:10.7554/elife.77522), 2022-10-10

**A**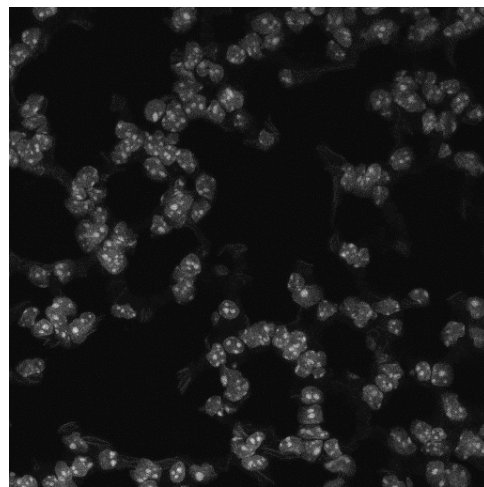*DAPI*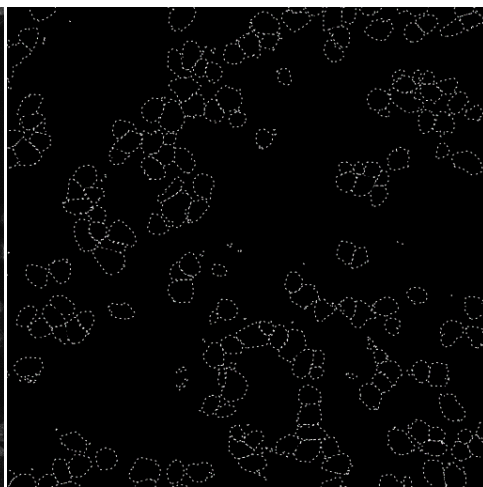*Cell Localization*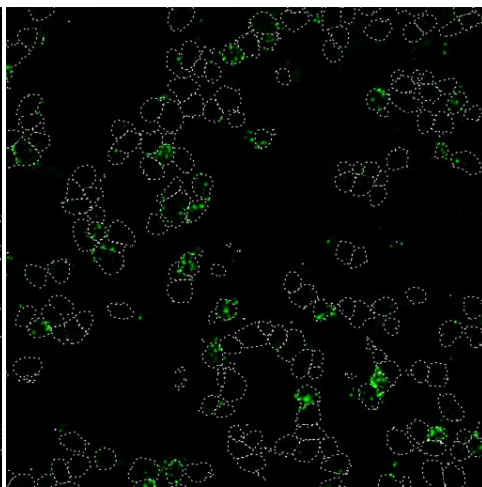*Pdgfra+*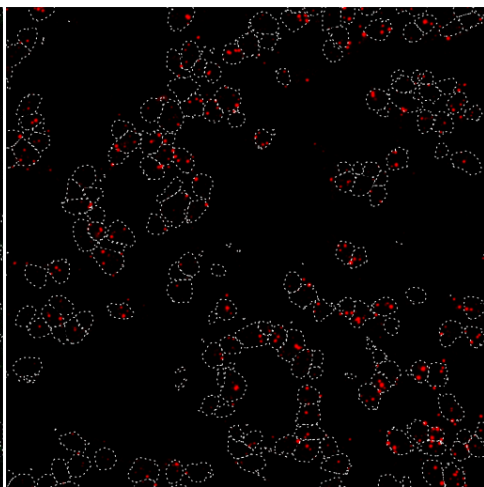*Igf1+*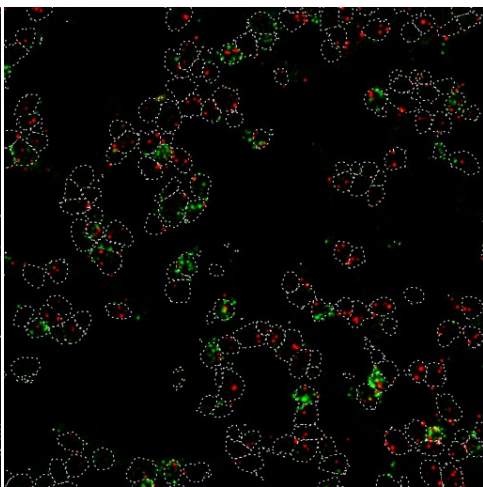*Pdgfra&Igf1+*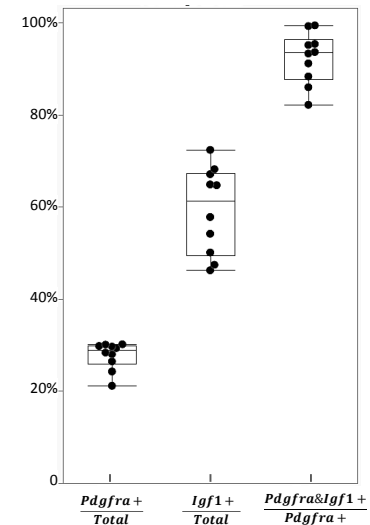**B**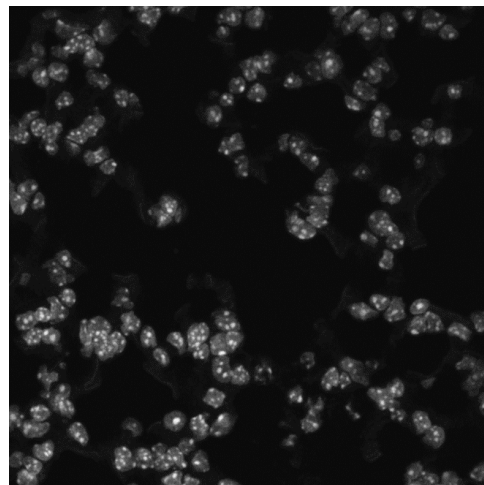*DAPI*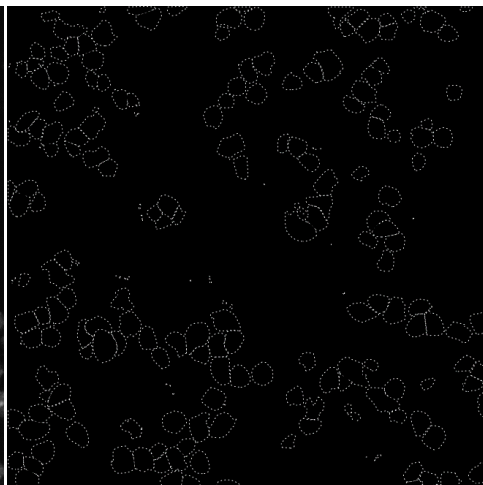*Cell Localization*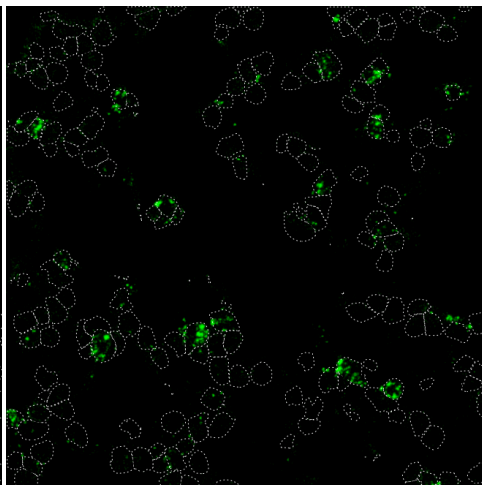*Pdgfra+*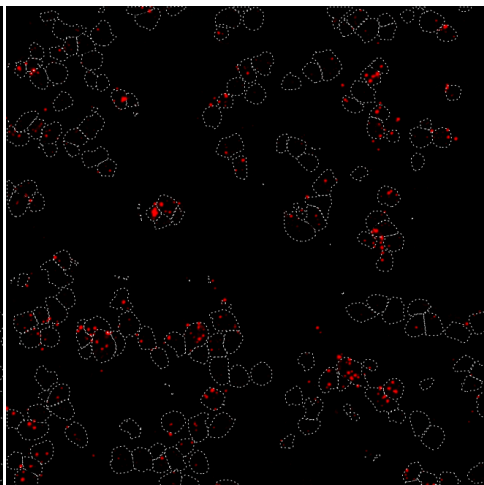*Igf1r+*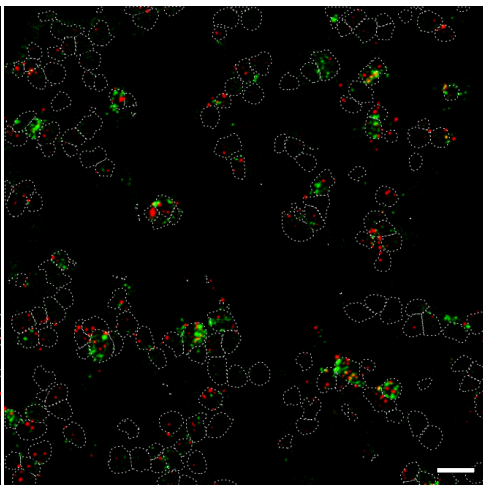*Pdgfra&Igf1r+*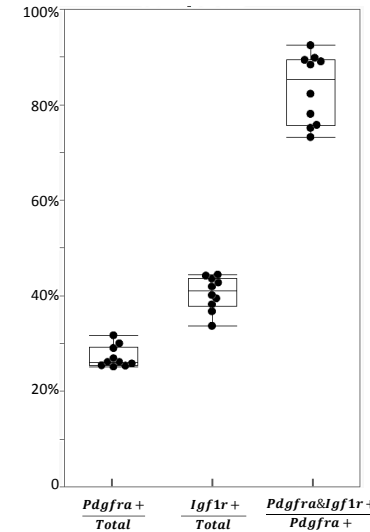

Supplement: supp [file elife-77522-supp-v1.zip]
