# Supplementary material for: Decoding the IGF1 signaling gene regulatory network behind alveologenesis from a mouse model of bronchopulmonary dysplasia
Source: eLife journal article supplement (doi:10.7554/elife.77522), 2022-10-10
Supplement: supp [file elife-77522-supp-v1.zip]

**A**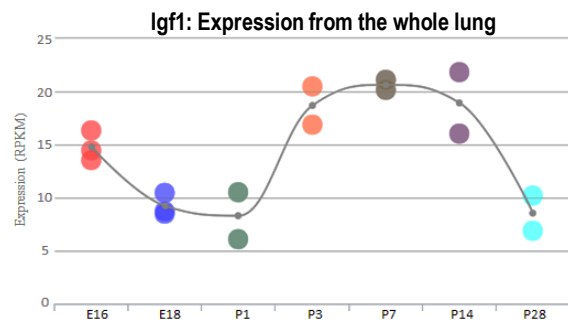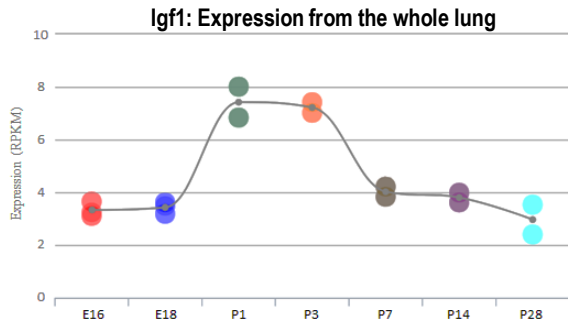

(Data source: Lung developmental Time Course Analysis from LungMap)

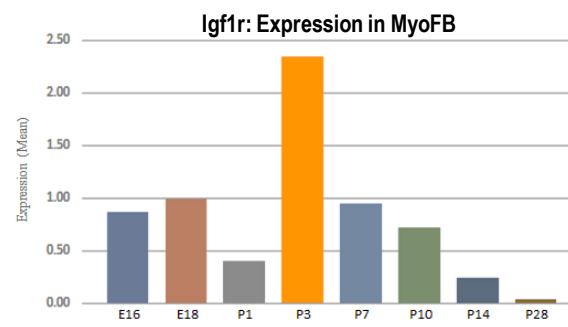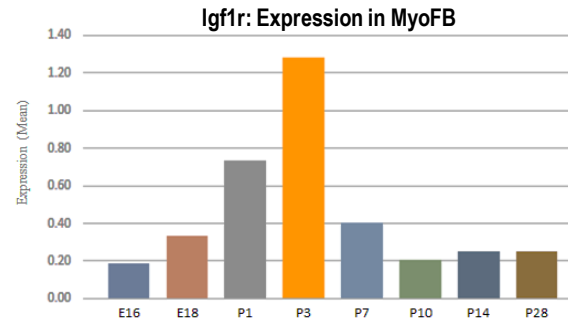

(Data source: LGEA-Drop-seq and 10x single cell data from LungMap)

**B**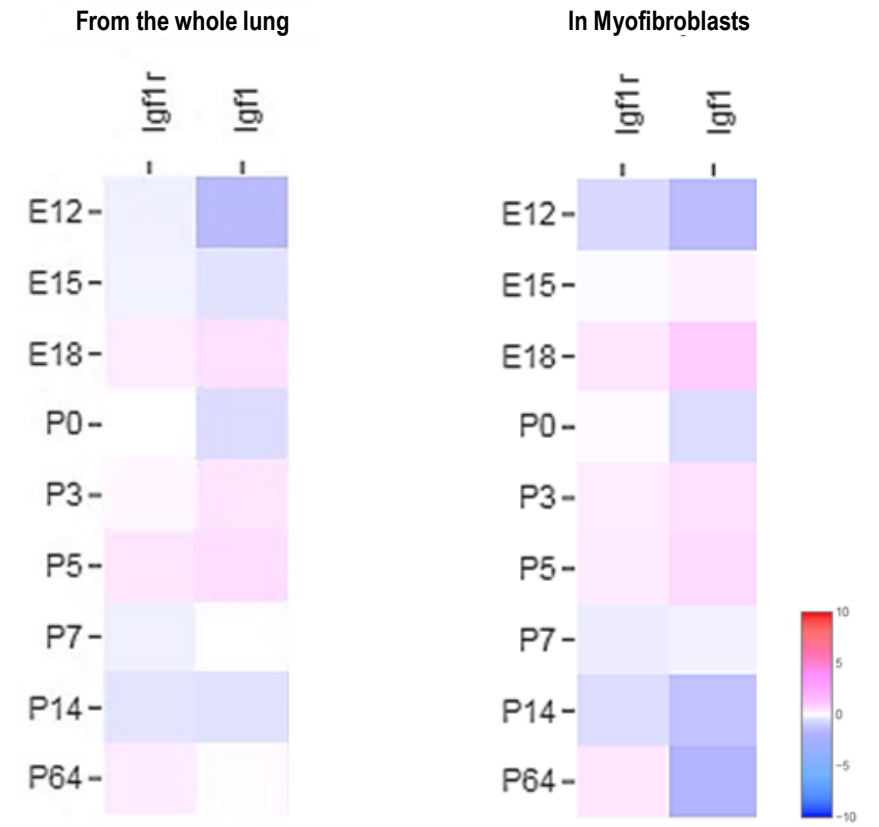

(Data source: Negretti et al., 2021)

**C**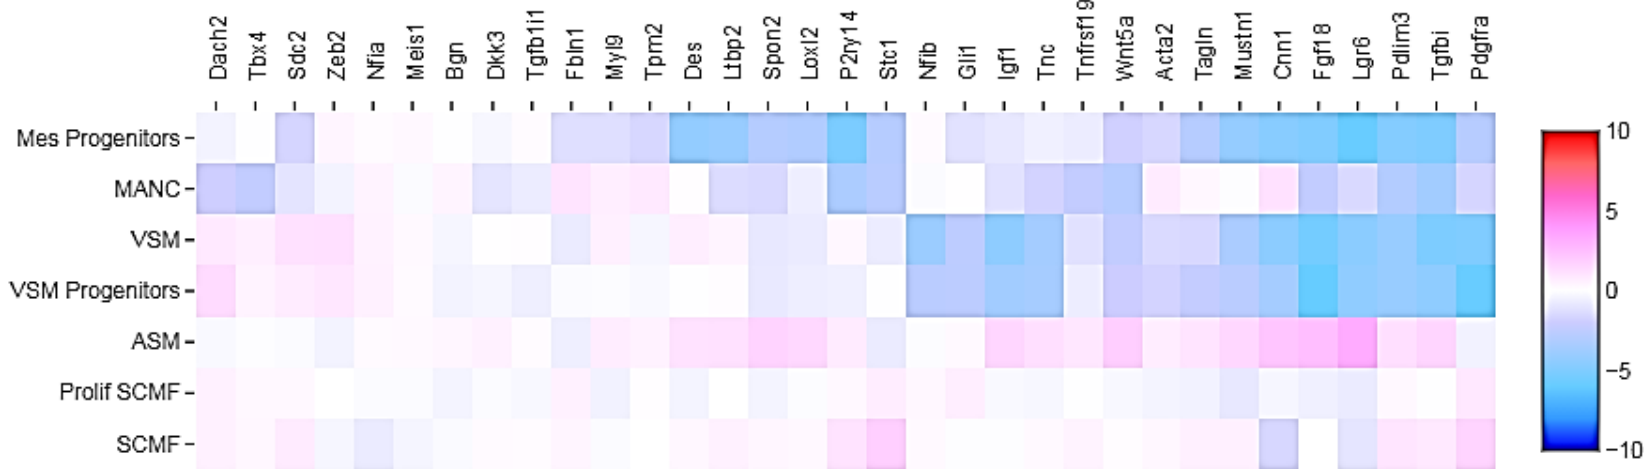

(Data source: PN7 from Zepp et al., 2021)

**D**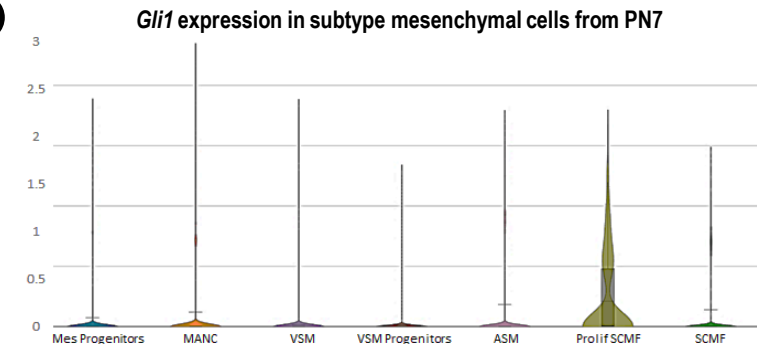**E**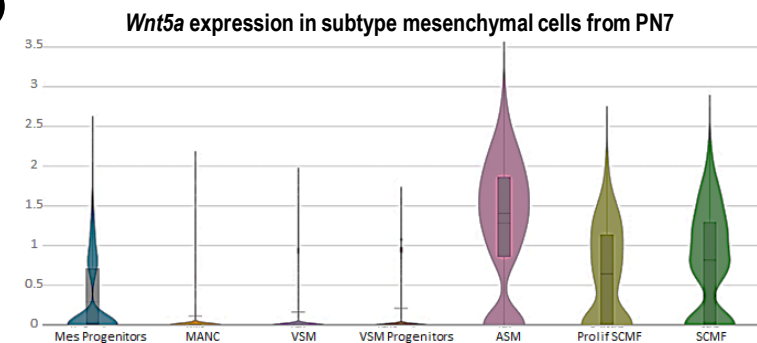

(Data source: Zepp et al., 2021)

**F**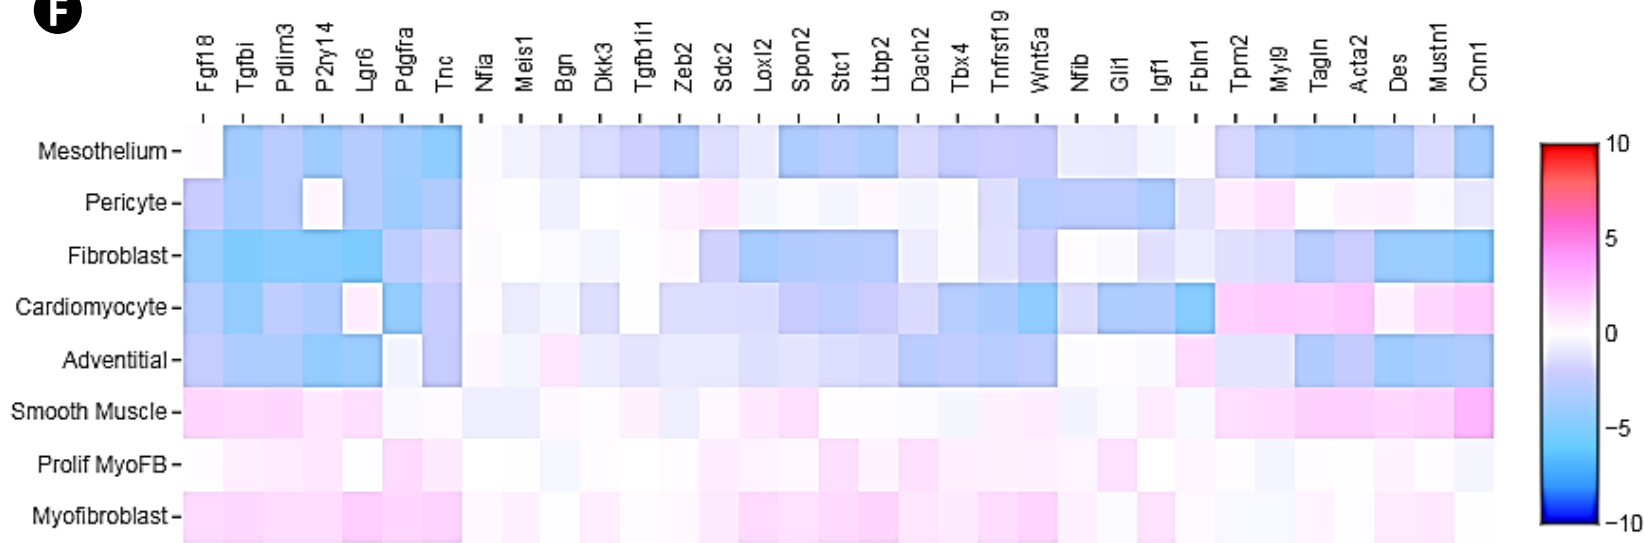

(Data source: PN5 from Negretti et al., 2021)

**G**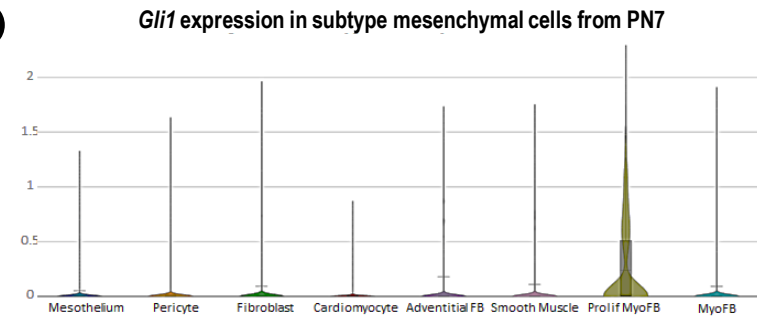**H**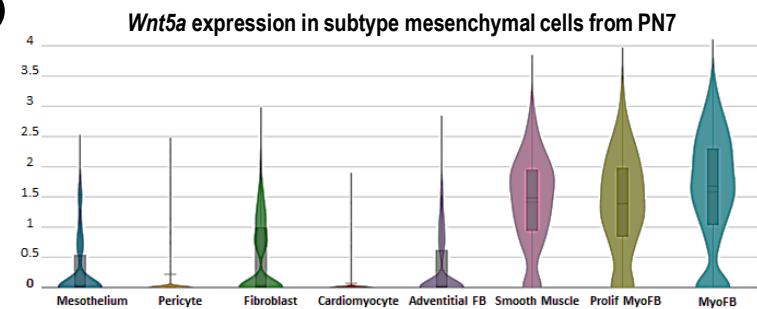

(Data source: Negretti et al., 2021)
