# Supplementary figures and images for: Decoding the IGF1 signaling gene regulatory network behind alveologenesis from a mouse model of bronchopulmonary dysplasia
Source: eLife journal article supplement (doi:10.7554/elife.77522), 2022-10-10

**A** Bulk RNAseq (GSE126457, GSE182886 and GSE106960)

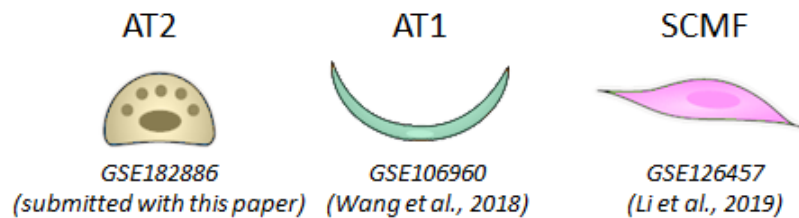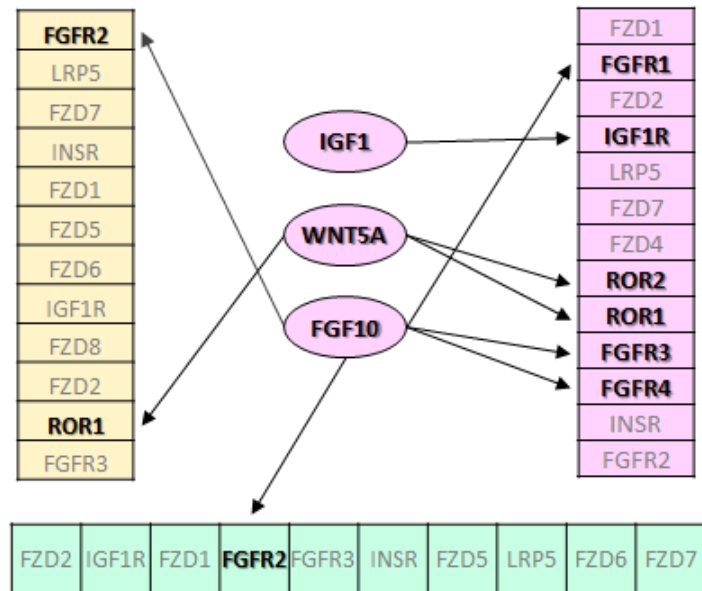

**B** scRNAseq (GSE160876 and GSE165063)

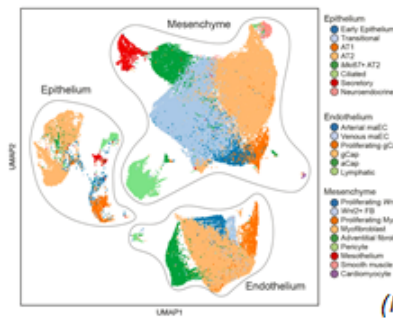

(Negretti et al., 2021)

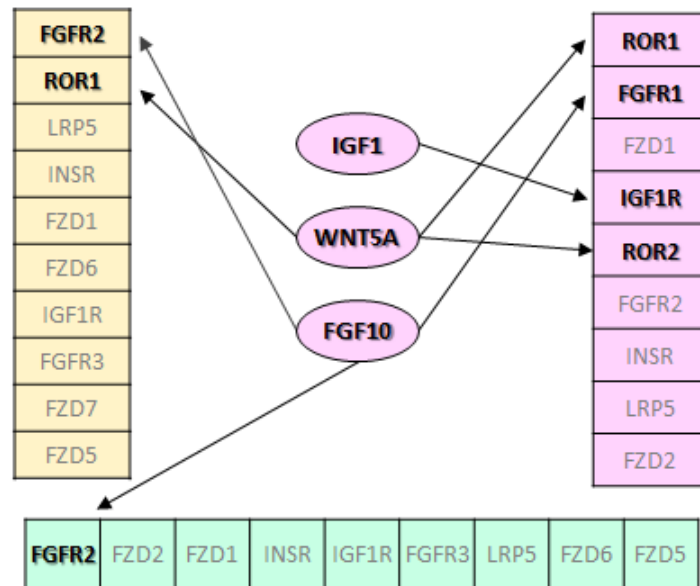

**C** scRNAseq (GSE149563)

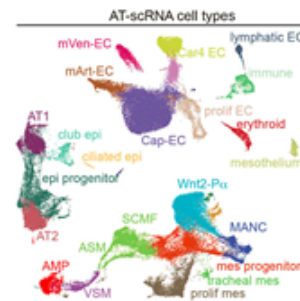

(Zepp et al., 2021)

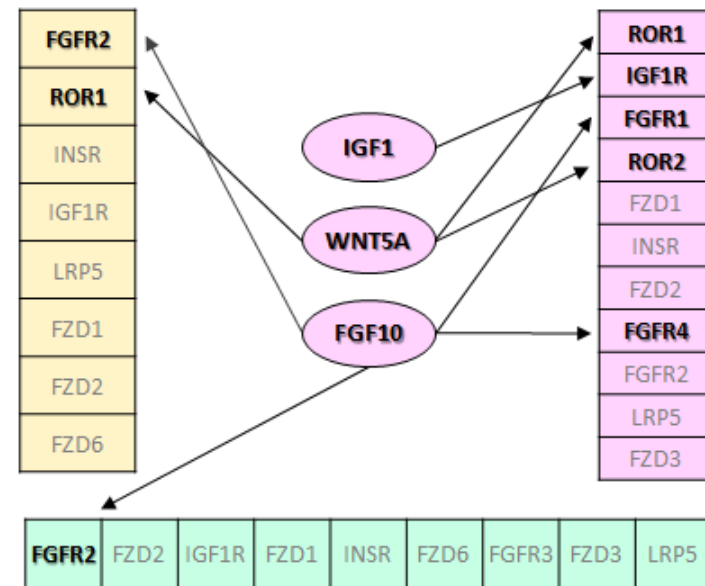

Supplement: supp [file elife-77522-supp-v1.zip]

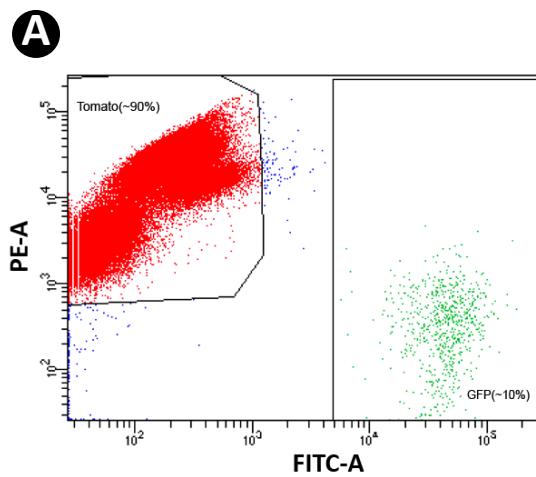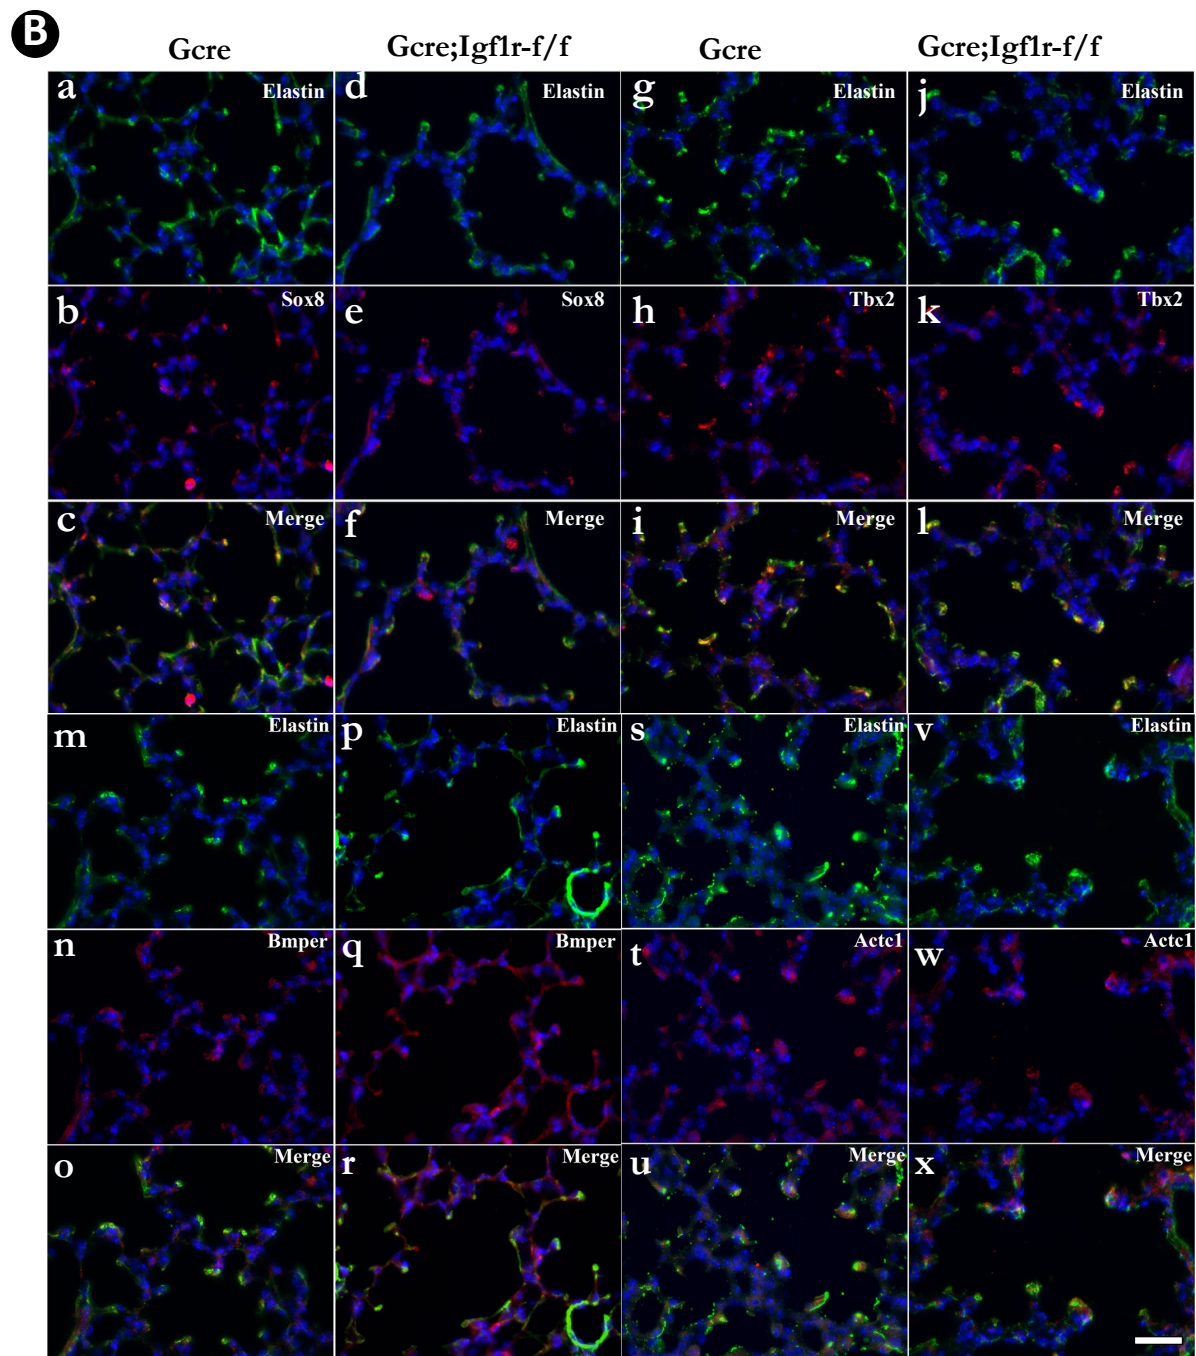

Supplement: supp [file elife-77522-supp-v1.zip]

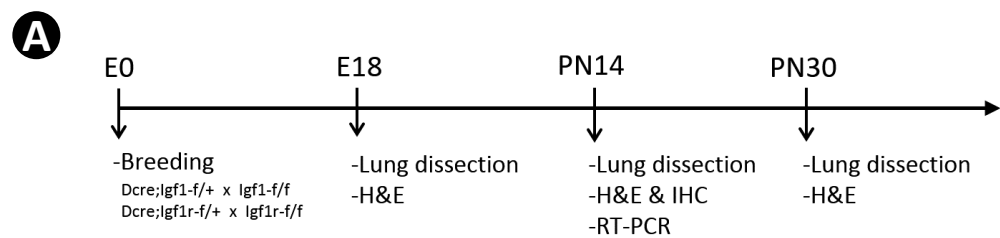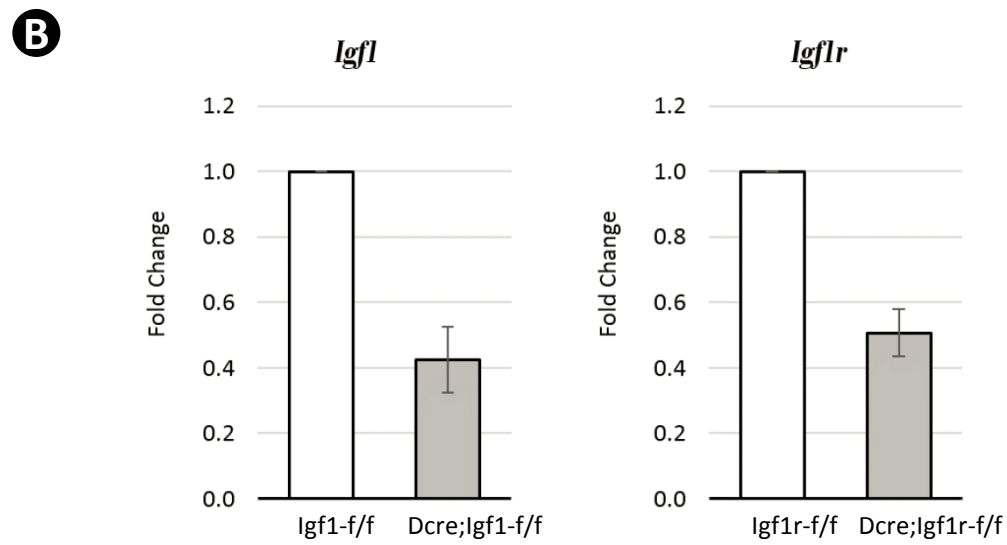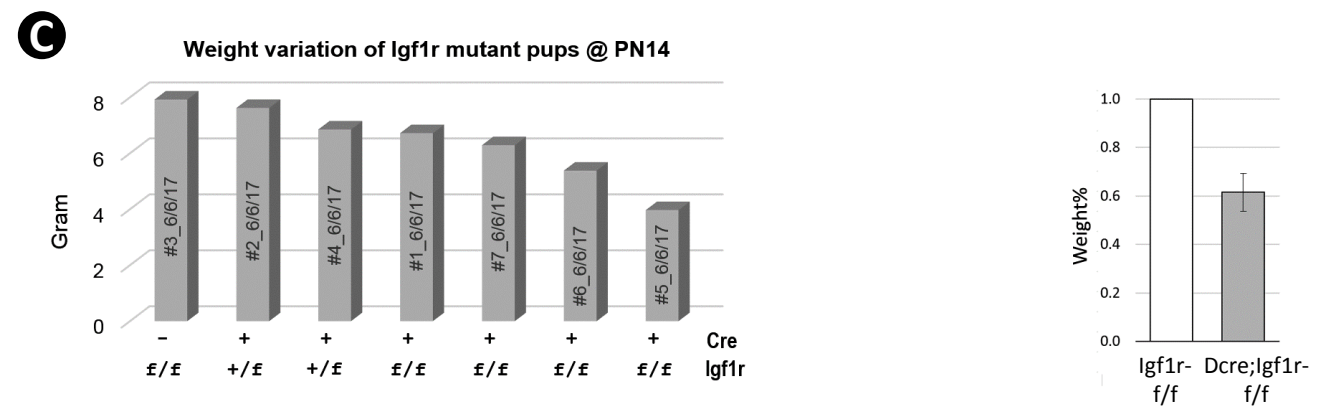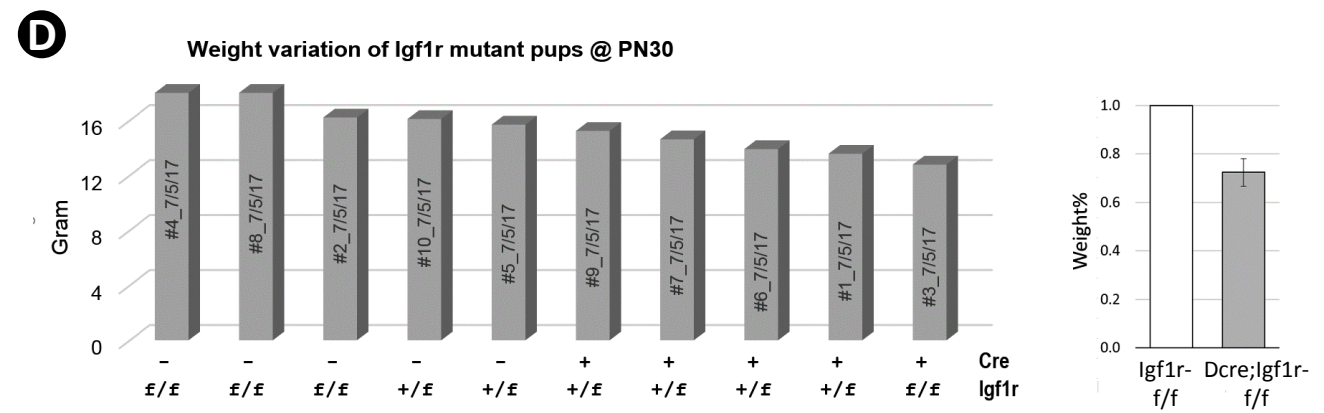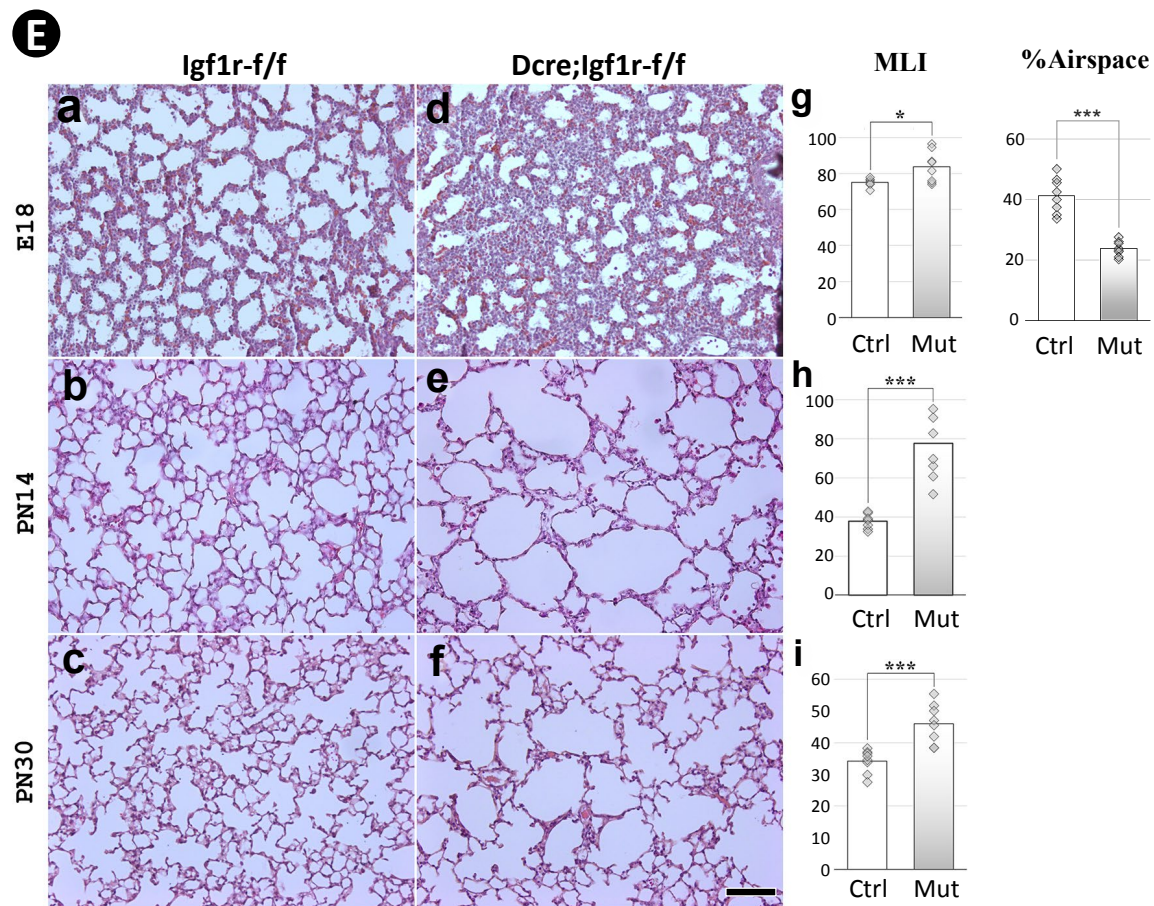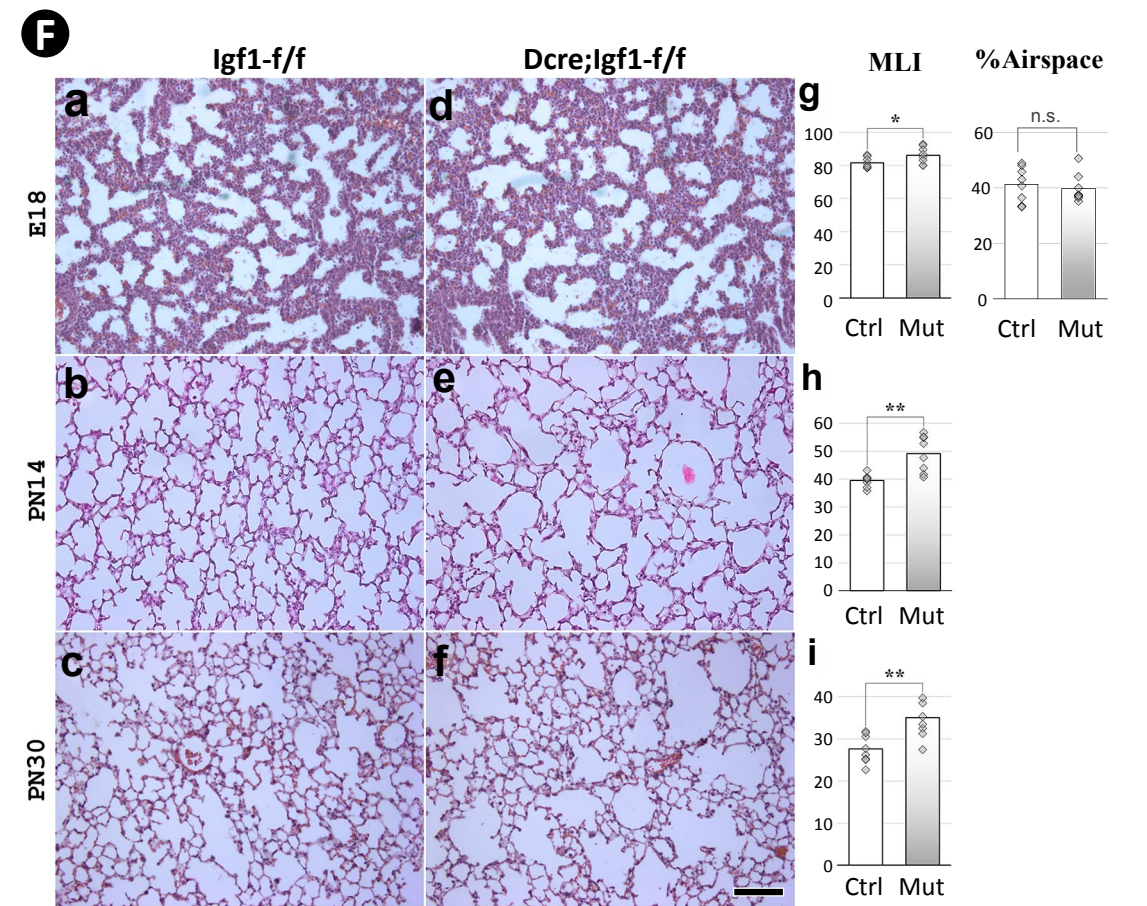

Supplement: supp [file elife-77522-supp-v1.zip]

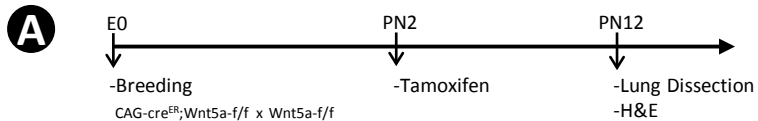

**B**

**Wnt5a-f/f**                      **Ccre;Wnt5a-f/f**

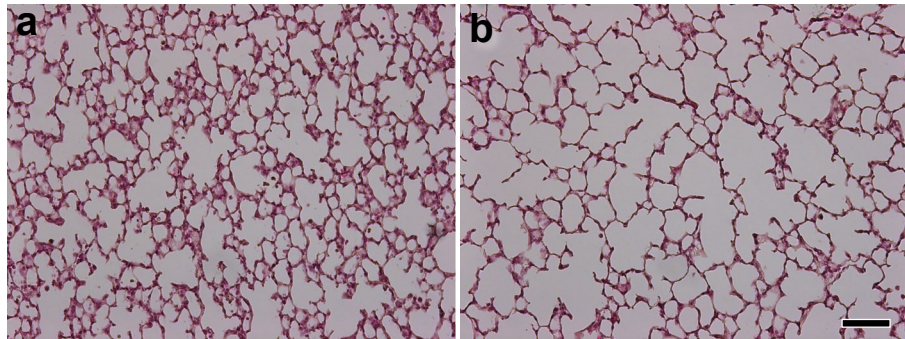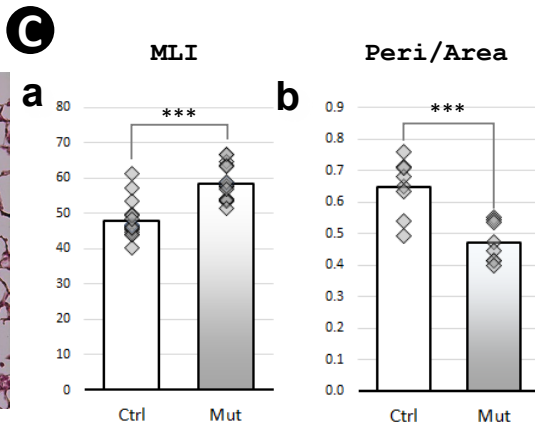

Supplement: supp [file elife-77522-supp-v1.zip]

**A**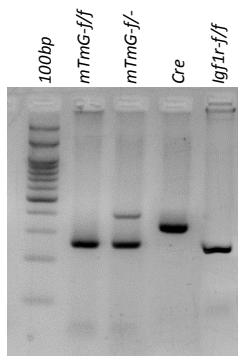**B**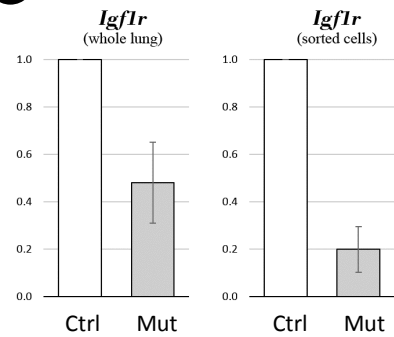**D**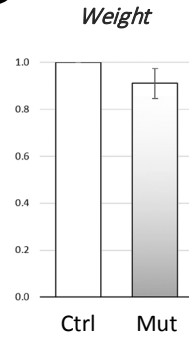**E**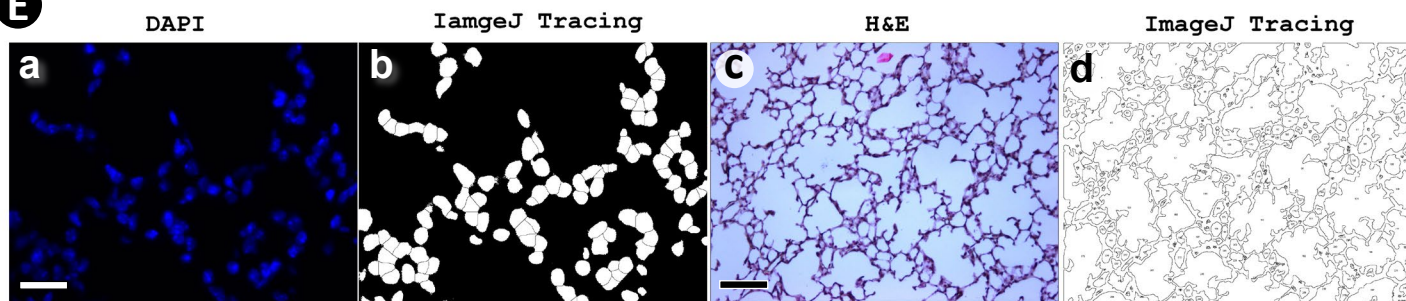**C**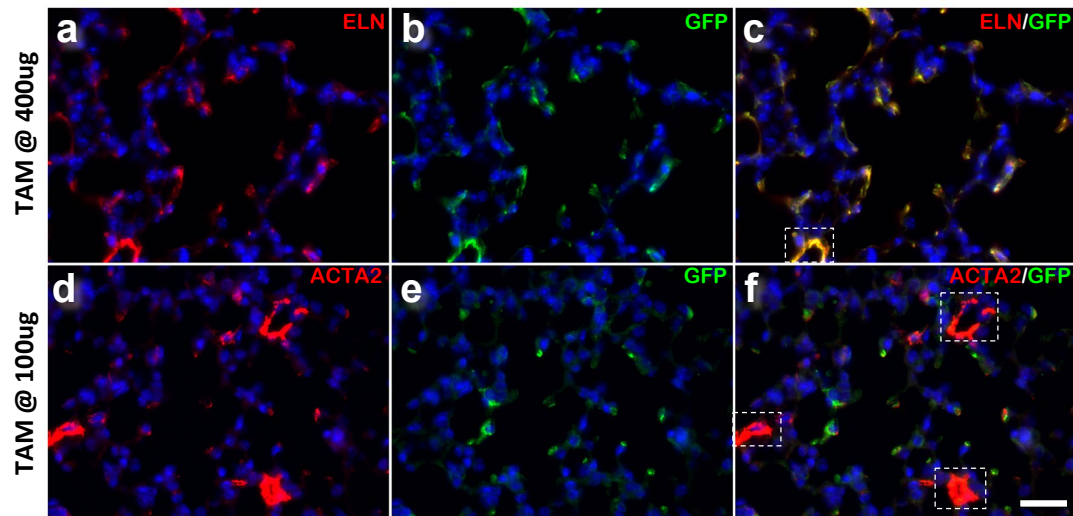**F**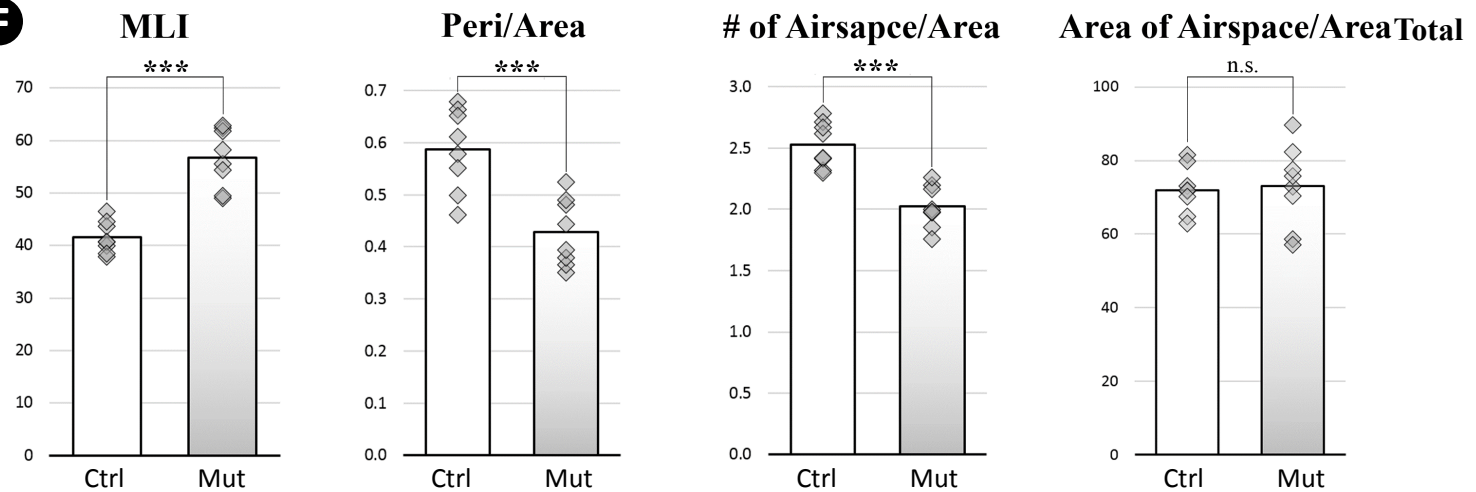**H**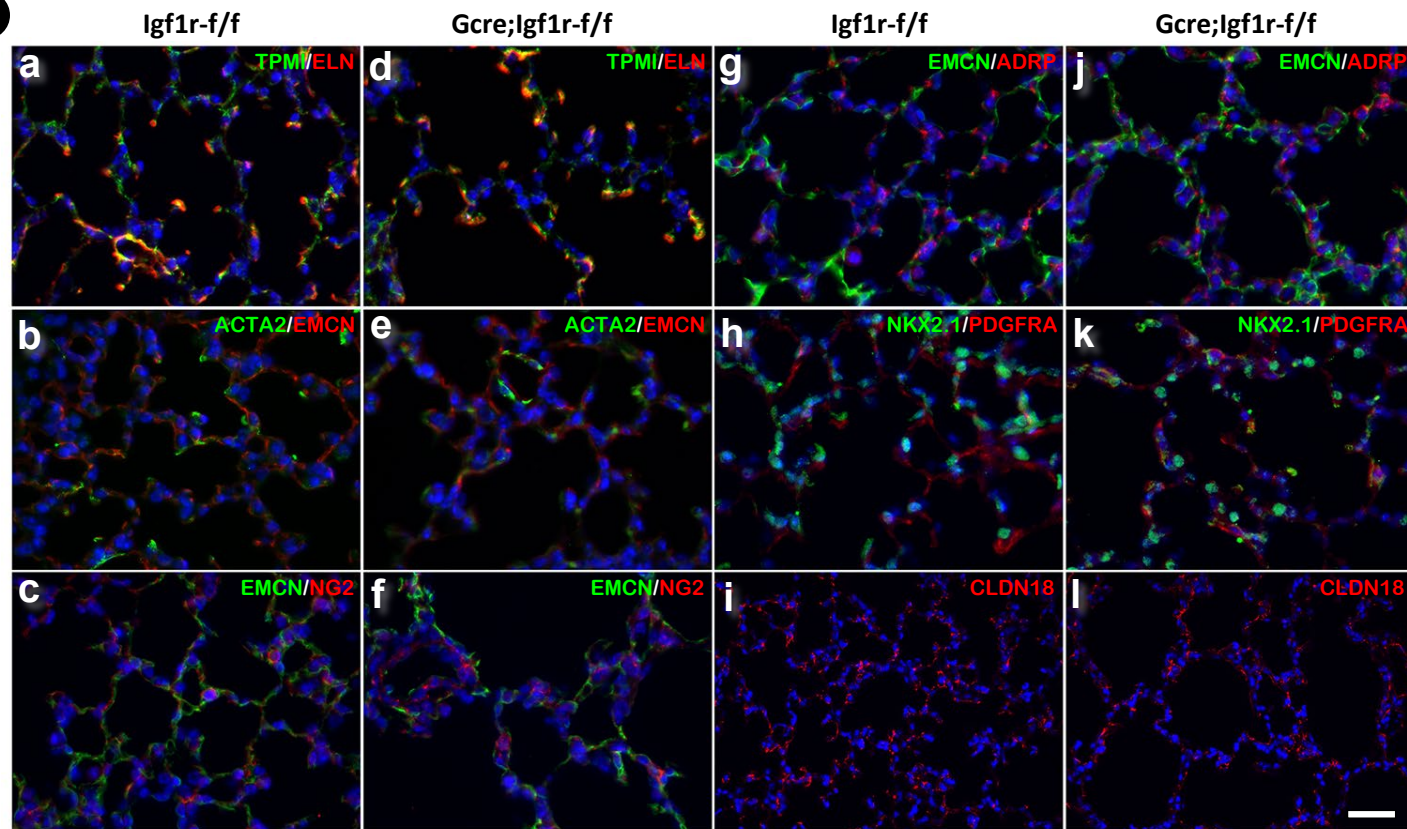**G**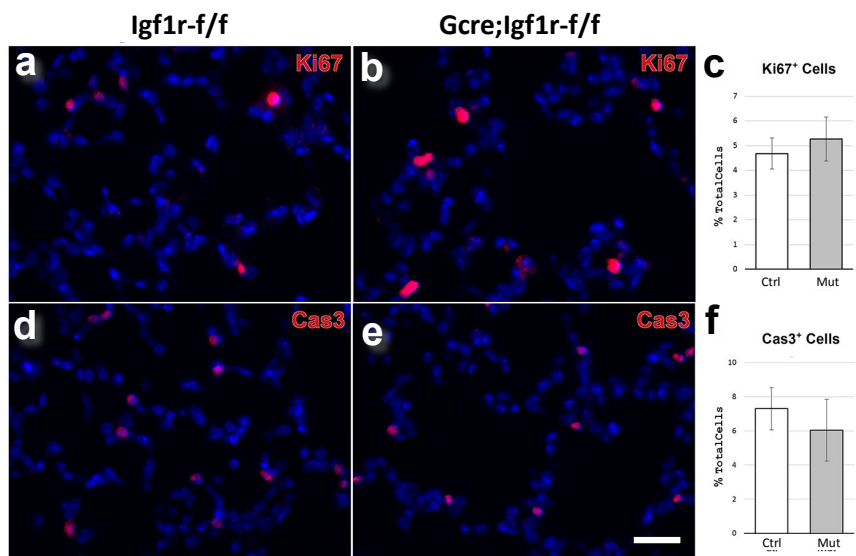**I**

Lung marker gene in Gcre;Igf1-f/f

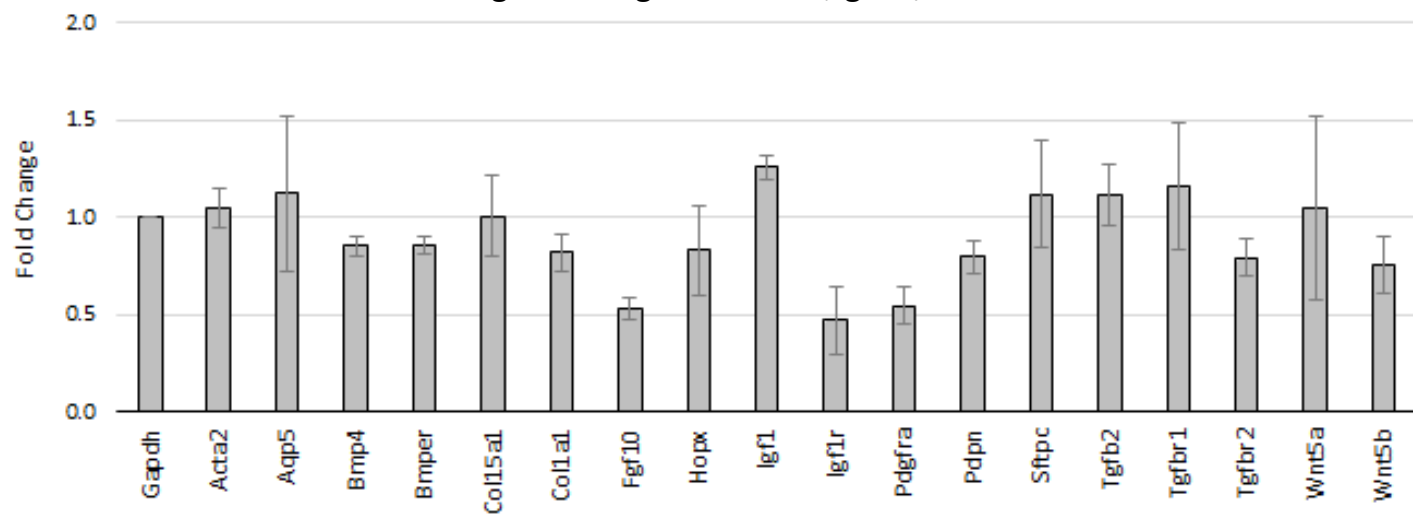**J**

Angiogenesis gene in Gcre;Igf1-f/f

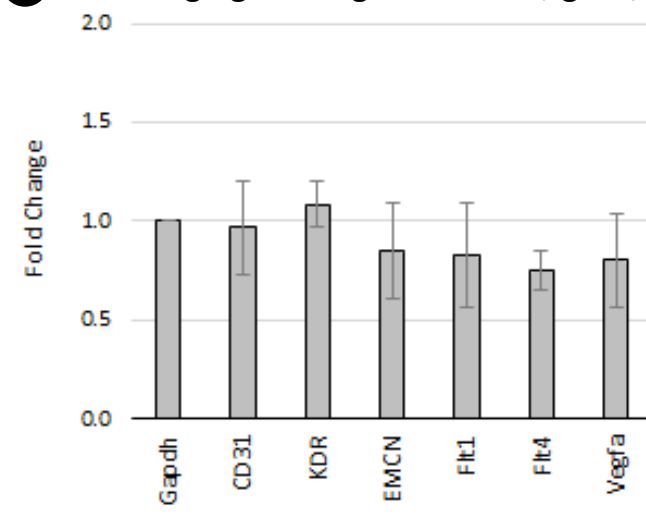

Supplement: supp [file elife-77522-supp-v1.zip]

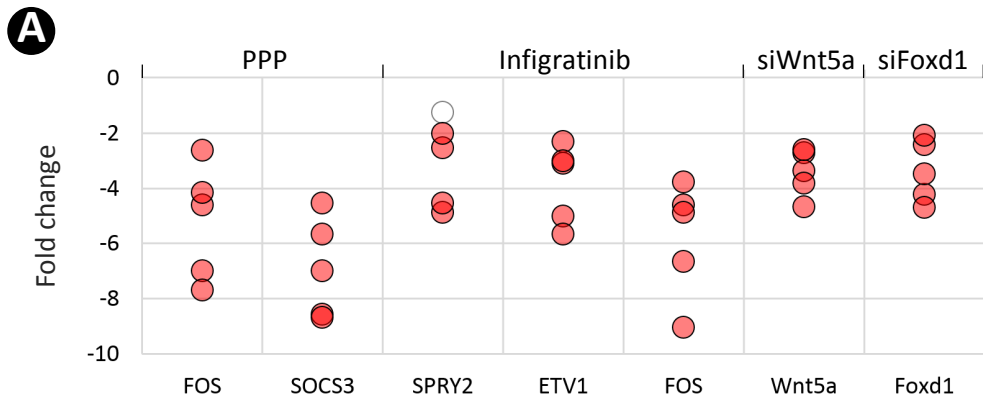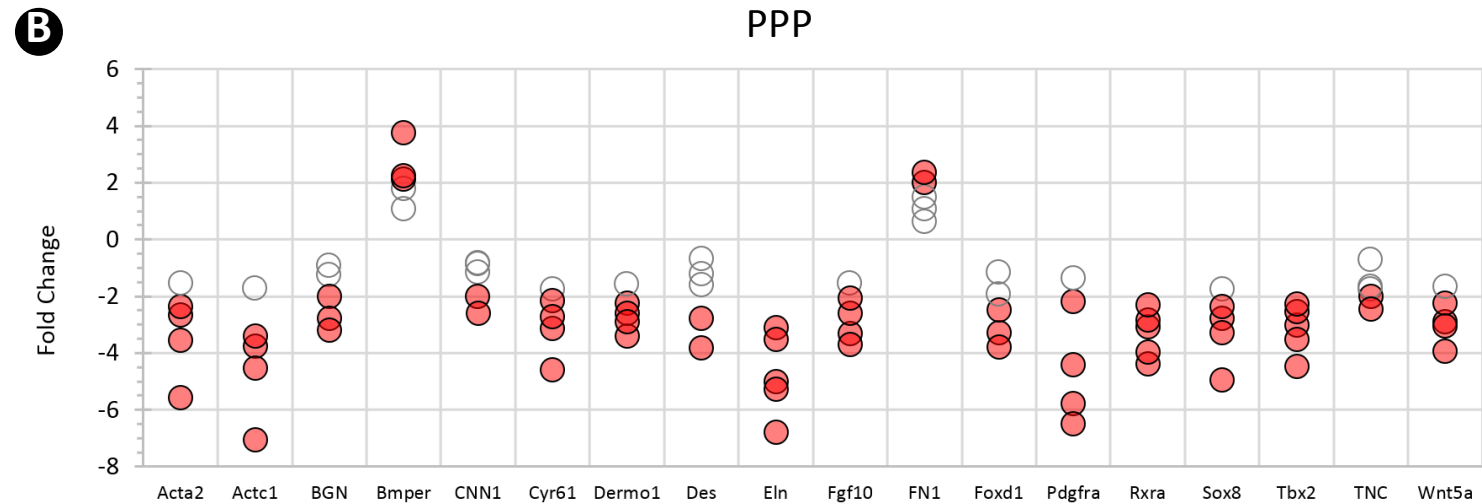

Supplement: supp [file elife-77522-supp-v1.zip]
